# A new early-branching armoured dinosaur from the Lower Jurassic of southwestern China

Xi Yao<sup>1\*</sup>, Paul M Barrett<sup>2\*</sup>, Lei Yang<sup>3</sup>, Xing Xu<sup>4,5†</sup>, Shundong Bi<sup>1,6†</sup>

<sup>1</sup>Centre for Vertebrate Evolutionary Biology, Yunnan University, Kunming, 650091, China;

<sup>2</sup>Department of Earth Sciences, Natural History Museum, Cromwell Road, London, SW7 5BD,

UK; <sup>3</sup>Yimen Administration of Cultural Heritage, Yimen, 651100, China; <sup>4</sup>Key Laboratory of

Evolutionary Systematics of Vertebrates, Institute of Vertebrate Paleontology and

Paleoanthropology, Chinese Academy of Sciences, Beijing, 100044, China; <sup>5</sup>Center for

Excellence in Life and Paleoenvironment, Beijing, 100044, China; <sup>6</sup>Department of Biology,

Indiana University of Pennsylvania, Indiana, PA, 15705, USA

\*Joint first authors; these authors contributed equally.

† For correspondence: Xing Xu, [xu.xing@ivpp.ac.cn](mailto:xu.xing@ivpp.ac.cn); Shundong Bi, [shundong.bi@iup.edu](mailto:shundong.bi@iup.edu).

Competing interests: The authors declare that no competing interests exist.

## Abstract

The early evolutionary history of the armoured dinosaurs (Thyreophora) is obscured by its patchily distributed fossil record and by conflicting views on the relationships of its Early Jurassic representatives. Here, we describe an early-diverging thyreophoran from the Lower Jurassic Fengjiahe Formation of Yunnan Province, China, on the basis of an associated partial skeleton that includes skull, axial, limb and armour elements. It can be diagnosed as a new taxon based on numerous cranial and postcranial autapomorphies and is further distinguished from all other thyreophorans by a unique combination of character states. Although the robust postcranium is similar to that of more deeply nested ankylosaurs and stegosaurs, phylogenetic analysis recovers it as either the sister taxon of *Emausaurus* or of the clade *Scelidosaurus*+Eurypoda. This new taxon, *Yuxisaurus kopchicki*, represents the first valid thyreophoran dinosaur to be described from the Early Jurassic of Asia and confirms the rapid geographic spread and diversification of the clade after its first appearance in the Hettangian. Its heavy build and distinctive armour also hint at previously unrealised morphological diversity early in the clade's history.

## Introduction

Thyreophoran dinosaurs were important components of many terrestrial faunas from the Late Jurassic until the end of the Cretaceous, particularly in Laurasia (Galton and Upchurch, 2004; Vickaryous et al., 2004; Arbour & Currie, 2016; Maidment et al., 2020). However, many aspects of their earlier evolutionary history remain contentious and poorly known. The majority of late Mesozoic armoured dinosaurs belonged to one of two major lineages – Ankylosauria or Stegosauria – whose earliest members are currently known from the Middle Jurassic (Galton, 1983; Salgado et al., 2017; Maidment et al., 2020, 2021). Almost all recent analyses of ornithischian interrelationships have united these two lineages in a clade named Eurypoda, which is thought to have originated sometime in the Early–early Middle Jurassic (e.g., Sereno, 1999; Norman et al., 2004; Butler et al., 2008; Boyd, 2015; Dieudonné et al., 2020).

49 However, several Early Jurassic thyreophorans lack key ankylosaurian and stegosaurian  
50 synapomorphies. These include *Laquintasaura* and *Lesothosaurus*, which are recovered as  
51 early, unarmoured thyreophorans by some phylogenetic analyses (Butler et al., 2008; Boyd,  
52 2015; Baron et al., 2017a) but placed in alternative positions outside Thyreophora in others  
53 (Serenó, 1999; Dieudonné et al., 2020). Less controversially, three other taxa are consistently  
54 recovered as early-diverging members of the clade: *Scutellosaurus lawleri* (Sinemurian–  
55 Toarcian, Kayenta Formation, USA; Colbert, 1981; Rosenbaum and Padian, 2000; Breeden  
56 and Rowe, 2020; Breeden et al., 2021), *Emausaurus ernsti* (early Toarcian, unnamed unit,  
57 Germany; Haubold, 1990) and *Scelidosaurus harrisonii* (Sinemurian–early Pliensbachian,  
58 Charmouth Mudstone Formation, UK; Owen, 1861, 1863; Norman, 2020a, b, c).

59 Most recent studies have concluded that *Scutellosaurus*, *Emausaurus* and *Scelidosaurus*  
60 are successive sister taxa to Euryptoda (Serenó, 1999; Norman et al., 2004; Butler et al., 2008;  
61 Boyd, 2015; Dieudonné et al., 2020). However, an alternative hypothesis suggests that  
62 *Scelidosaurus* was the sister taxon of Ankylosauria, together forming the clade  
63 Ankylosauromorpha, which in turn is the sister group of Stegosauria. This relationship was  
64 first proposed formally by Carpenter (2001) and received support from Norman (2021; but see  
65 Results, below). Testing these alternatives will rely on the discovery of new material and on  
66 the construction of larger phylogenetic data matrices including more characters suited to  
67 unravelling early thyreophoran relationships.

68 Two probable thyreophoran taxa have been described from the Early Jurassic of China –  
69 ‘*Bienosaurus lufengensis*’ and ‘*Tatisaurus oehlerii*’ – both erected on the basis of fragmentary  
70 material from the Lower Jurassic Lufeng Formation of Yunnan Province (Simmons, 1965;  
71 Dong, 2001). However, in both cases the material is insufficient to support their validity and  
72 these taxa are currently regarded as nomina dubia, although the material does exhibit  
73 thyreophoran characteristics (Norman et al., 2007; Raven et al., 2019). Consequently, these  
74 specimens offer little useful information on thyreophoran evolution, although they do extend  
75 the range of the clade to East Asia at this time, suggesting that the group achieved a global (or  
76 at least pan-Laurasian) distribution soon after its origin (Raven et al., 2019).

77 Here, we describe a new thyreophoran taxon from the Lower Jurassic Fengjiahe Formation  
78 of Yunnan Province, southwestern China on the basis of a partial skeleton and discuss its  
79 significance for early ornithischian evolution.

80

## 81 **Geological setting**

82

83 The main exposures of the Fengjiahe Formation are found in the Chuxiong Basin and  
84 Yiliang region of central and northeastern Yunnan, respectively (Figure 1A, B). It consists  
85 primarily of dull purplish and dark red mudstone and siltstone, mixed with yellowish or greyish  
86 green siltstone and quartz sandstone, calcareous mudstone and nodules (Fang et al., 2008).  
87 Pang et al. (2002) recognized a transition bed between the underlying coal-bearing Shezi  
88 Formation and the overlying Fengjiahe Formation and designated this transitional bed as a new  
89 lithostratigraphic unit, the Yubacun Formation. This revision resulted in the separation of the  
90 lower variegated beds from the overlying purple sediments of the Fengjiahe Formation (Pang  
91 et al., 2002). Although the presence of the Yubacun Formation in the Jiaojiadian area has not  
92 been confirmed, the lower greyish-green sandstones formerly referred to the Fengjiahe  
93 Formation in this area coincide well with the lithology of the Yubacun Formation and are now  
94 considered to represent this unit (Figure 1C). Here, therefore, we restrict the Fengjiahe  
95 Formation to the sequence above these greyish-green sandstones (Figure 1C).

96 The Fengjiahe Formation is currently thought to be a lateral equivalent of the Lufeng  
97 Formation, which crops out in the adjacent Lufeng Basin (Fang et al., 2008). Biostratigraphical  
98 correlations based on fossil vertebrates have suggested that the Lufeng Formation is Lower

99 Jurassic (Hettangian–Sinemurian) in age (Luo and Wu, 1994), and the similar vertebrate fauna  
100 and correlations based on invertebrate and micropalaeontological material from the Fengjiahe  
101 Formation are consistent with this (Chen et al., 1982). However, more recent  
102 magnetostratigraphic evidence posits a younger age for the Lufeng Formation, namely late  
103 Sinemurian–Toarcian (Huang et al., 2005). Although it has not yielded as many vertebrate  
104 fossils as the Lufeng Formation, the Fengjiahe Formation has produced several important early  
105 sauropodomorph dinosaurs, such as *Chinshakiangosaurus chunghoensis*, *Irisosaurus*  
106 *yimenensis*, *Lufengosaurus huenei*, *Yunnanosaurus huangi*, *Y. robustus* and *Yimenosaurus*  
107 *yangi*, as well as the theropod *Shuangbaisaurus anlongbaoensis* and dinosaur footprints (Zhen  
108 et al., 1986; Bai et al., 1990; Dong, 1992; Bai, 1999; Upchurch et al., 2007; Wang et al., 2017;  
109 Peyer de Fabrègues et al., 2020). The new thyreophoran was discovered in the upper part of  
110 the Fengjiahe Formation, as is usually the case for the vertebrate material recovered from this  
111 stratum.  
112

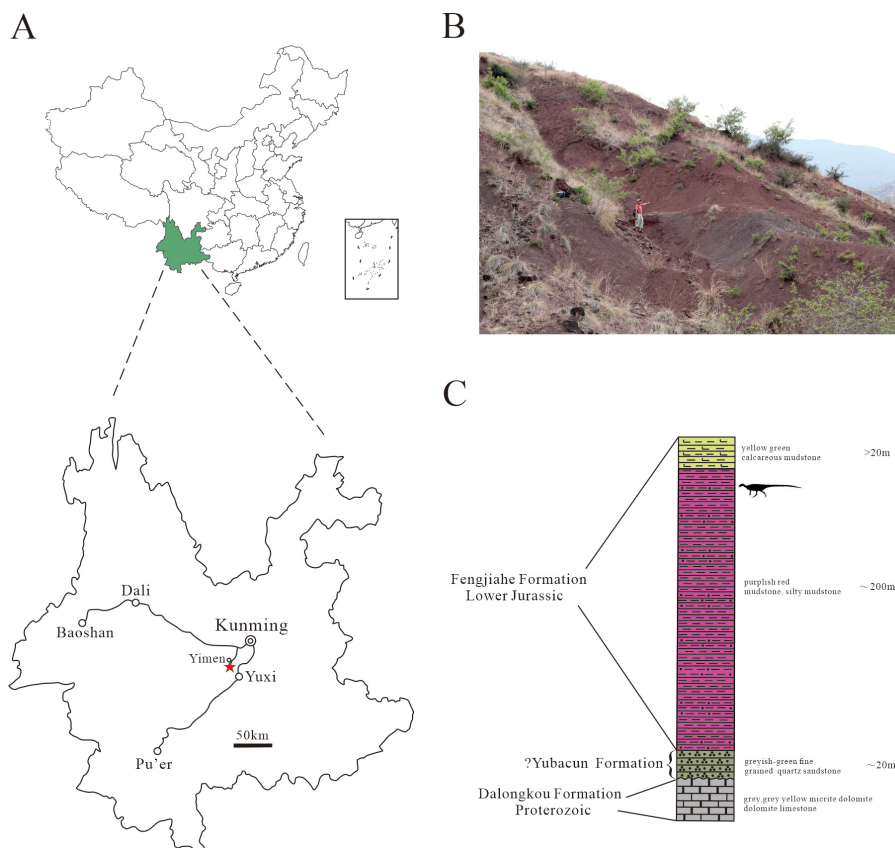

113  
114  
115 **Figure 1.** A, location of the quarry yielding *Yuxisaurus kopchicki*, with a red star indicating the locality. B,  
116 sediments of the Fengjiahe Formation at the quarry site. C, stratigraphic column of the Fengjiahe Formation in  
117 the Jiaojiadian area (modified from Bai, 1999).  
118

## 119 Systematic palaeontology

120

121 Dinosauria Owen, 1842

122 Ornithischia Seeley, 1887

123 Thyreophora Nopcsa, 1915 (*sensu* Norman, 1984)

124 *Yuxisaurus kopchicki* gen. et sp. nov.

125

126 **Holotype**

127 CVEB (Centre for Vertebrate Evolutionary Biology, Yunnan University) 21701 a partial  
128 skeleton with cranial and associated postcranial elements (Figure 2), including: the right-hand  
129 side of the skull (fused maxilla, lacrimal, nasal, prefrontal jugal, supraorbitals); braincase;  
130 partial skull roof; posterior parts of the mandibles; four articulated cervical vertebrae; five  
131 dorsal vertebrae; left proximal and right distal scapulae; right humerus; left distal femur; more  
132 than 120 osteoderms; and several unidentifiable elements.

133

### 134 **Etymology**

135 The generic name refers to the type locality in Yuxi Prefecture, with the suffix -saurus from  
136 the Greek, meaning reptile. The specific name is after Dr. John J. Kopchick in recognition of  
137 his contributions to biology and the IUP Science Building.

138

### 139 **Horizon and locality**

140 Upper part of the Fengjiahe Formation, near Jiaojiadian village, Yimen County, Yuxi  
141 Prefecture, Yunnan Province, China; ?late Sinemurian–Toarcian (Huang et al., 2005; Figure  
142 1C).

143

### 144 **Diagnosis**

145 A medium-sized armoured dinosaur that can be distinguished from all other thyreophorans  
146 by the following autapomorphies: deep, subtriangular, dorsoventrally elongated depression on  
147 either side of the nuchal crest; a ‘V’-shaped notch on the dorsal margin of the paroccipital  
148 process; basal tubera that are considerably ventrally offset with respect to the occipital condyle,  
149 so that they are clearly visible in posterior view; basiptyergoid processes that are ventrally  
150 offset with respect to the basal tubera, creating a dorsoventrally deep, ‘stepped’ basicranial  
151 profile in lateral view; cultriform process ventrally offset with respect to the occipital condyle  
152 in lateral view; angular with elongate, dorsally deflected posterior process that almost reaches  
153 the posterior margin of the retroarticular process; atlas intercentrum with symmetrical  
154 anterolaterally directed low ridges and associated arrow-like depressions on its ventral surface;  
155 relatively short anterior cervical centra (length/height ratio <1.5); cervical centra lack ventral  
156 keels.

157 In addition, *Yuxisaurus* can be distinguished from other early thyreophorans using the  
158 following combination of character states: antorbital fossa subtriangular in outline, unlike that  
159 of *Scelidosaurus*, and with rounded corners, unlike that in *Scutellosaurus*; anterior ramus of  
160 the jugal projects posteroventrally, rather than horizontally as in *Emausaurus*, *Scelidosaurus*  
161 and *Scutellosaurus*; maxillary tooth row bowed medially to a greater degree than in  
162 *Emausaurus*, *Scelidosaurus* or *Scutellosaurus*; maxillary tooth crowns bearing well-defined  
163 ridges, which are absent in *Emausaurus*, *Scelidosaurus* and *Scutellosaurus*; a relatively short  
164 axial neural spine with a sinuous dorsal margin in lateral view, contrasting with the straight  
165 margin and significant posterior expansion of the neural spine present in *Scelidosaurus*;  
166 elongate axial rib, which extends to the midpoint of cervical vertebra 3, unlike the shorter rib  
167 present in *Scelidosaurus*; absence of lateral ridge on the axial rib, which is present in  
168 *Scelidosaurus*; proximal and distal expansions of the humerus relatively larger than in  
169 *Scelidosaurus* and *Scutellosaurus*; deep notch separating the humeral head and dorsal margin  
170 of the internal tuberosity, which is absent in *Scelidosaurus* and *Scutellosaurus*; and broad, ‘U’-  
171 shaped fossa on anterior surface of distal humerus, contrasting with the narrow, ‘V’-shaped  
172 fossae in *Scelidosaurus* and *Scutellosaurus*.

173

### 174 **Remarks**



175 The other thyreophoran taxa named from the Early Jurassic of China (*Bienosaurus*’ and  
176 *Tatisaurus*’) are based on undiagnostic material (Norman et al., 2007; Raven et al., 2019) and  
177 have limited anatomical overlap with *Yuxisaurus*. Consequently, it is not possible to make  
178 meaningful comparisons between them and no shared features can be identified. As a result,  
179 additional specimens will be required to establish whether these three named taxa are  
180 synonymous or if multiple thyreophoran taxa were present in the Early Jurassic of China.

181

## 182 **Description and comparisons**

183

### 184 **General comments**

185 The cranial bones are highly fused and the neurocentral sutures of all preserved cervical  
186 and dorsal vertebrae are invisible, in particular the completely obliterated axial neurocentral  
187 suture, suggesting that this specimen might represent an adult individual (Brochu, 1996).  
188 Compared to other closely-related taxa, the skull of *Yuxisaurus kopchicki* is larger than those  
189 of *Scutellosaurus lawleri* (Breedon and Rowe, 2020; Breedon et al., 2021), *Emausaurus ernsti*  
190 (Haubold, 1990) and *Scelidosaurus harrisonii* (Natural History Museum, London [NHMUK]  
191 PV R1111; Norman, 2020a), and *Yuxisaurus kopchicki* has much more robust fore- and  
192 hindlimbs than the latter.

193

### 194 **Skull**

195 The skull includes a braincase, part of the skull roof, the co-ossified right side of the facial  
196 region (including the maxilla, palpebral, middle supraorbital, lacrimal, prefrontal, jugal and  
197 probable nasal), and the posterior parts of both mandibles (Figures 2–7).

198

### 199 **Maxilla**

200 In lateral view, the right maxilla appears to be fused completely with the jugal posteriorly,  
201 the lacrimal posterodorsally and the nasal medially, with no identifiable sutures. Its anterior  
202 part is broken. An anteroposteriorly elongated antorbital fossa excavates its lateral surface  
203 deeply. The antorbital fossa is rounded and subtriangular in outline with long anterodorsal and  
204 ventral margins and a short posterodorsal margin (Figure 3A). The fossa reaches a maximum  
205 length of 48 mm and is 20 mm in height at its apex. Most of the antorbital fossa is closed  
206 medially by an extensive, sheet-like medial lamina, but a small, oval antorbital fenestra pierces  
207 its posteroventral corner (Figure 3A). This region differs from that of *Scelidosaurus*, which has  
208 a relatively smaller antorbital fossa with a dorsoventrally narrow, elliptical outline (NHMUK  
209 PV R1111; Norman, 2020a), but is very similar to that of *Emausaurus* (Haubold, 1990). It  
210 differs from those of *Lesothosaurus* (e.g., NHMUK PV RU B17; Porro et al., 2015),  
211 *Scutellosaurus* (Breedon and Rowe, 2020) and *Huayangosaurus* (Serenó and Dong, 1992) in  
212 having a fossa with smooth, rounded corners, in contrast to the sharp, angular corners seen in  
213 the latter taxa. *Yuxisaurus* also appears to lack the anterior antorbital fenestra present in  
214 *Scelidosaurus* (Norman, 2020a), but this area is still encased in matrix.

215 Ventral to the antorbital fossa is the medially inset buccal emargination, which is  
216 approximately 30 mm tall along most of its length except where the alveolar margin curves  
217 dorsally at its posterior end (Figure 3A). The buccal emargination is generally smooth and  
218 mildly depressed and contains several, small irregularly-placed shallow depressions that might  
219 be caused by weathering. The dorsal boundary of the buccal emargination is formed by a  
220 distinct, rounded ridge. Dorsal to this ridge, most of the lateral surface of the right maxilla is  
221 slightly convex, although the part anterior to the antorbital fossa is flat. The alveolar margin is  
222 scalloped in lateral view.

223 In medial view, a series of small rounded replacement foramina, which correspond one-to-  
224 one with the alveolar sockets, lies immediately above the alveolar margin (Figure 3B). The rest  
225 of the surface dorsal to the alveolar margin is smoothly convex, producing a vertical flange  
226 that extends dorsally for a short distance. The dorsal margin of this flange bears a shallow  
227 horizontal trough, which curves laterally anteriorly as well as posteriorly to communicate with  
228 the antorbital fenestra. It then continues posteroventrally for 21 mm (Figure 3B). The dorsal  
229 boundary of the flange is straight and oblique anteriorly, but curves downward posteriorly.  
230 Another groove starting halfway along the abovementioned trough extends posteriorly and  
231 expands into an elongated deep sulcus (Figure 3B, C). This groove probably represents the  
232 articular contact between the maxilla and the lacrimal/jugal. The bone sandwiched between  
233 these two grooves has a dorsal concavity terminating posteriorly in a blunt process, which  
234 grades into the deep fossa mentioned above.

235 The antorbital fenestra is a rounded opening in medial view. The medial (lacrimal) lamina  
236 of the right maxilla is concealed medially by the anterior (medial) process of the lacrimal. The  
237 articulation between the lacrimal and maxilla is clear anteriorly but indistinguishable  
238 posteriorly. The posterior part of the medial surface dorsal to the tooth row is sculptured,  
239 probably indicating the contact surface with the palatine.

240 In ventral view, the alveolar border is bowed medially and the deflection angle between the  
241 anterior and posterior axes of the tooth row is approximately  $148^\circ$  (Figure 3D). The bowing in  
242 *Yuxisaurus* is not as extreme as that present in many ankylosaurians where the tooth row is  
243 strongly bowed (Vickaryous et al., 2004), but is greater than that in *Scelidosaurus*,  
244 *Emausaurus*, *Scutellosaurus* and stegosaurians in which the maxillary tooth row is almost  
245 straight and only slightly curved (Colbert, 1981; Haubold, 1990; Sereno and Dong, 1992;  
246 Galton and Upchurch, 2004; Breeden and Rowe, 2020; Norman, 2020a; Breeden et al., 2021).  
247 Based on the number of alveoli present (Figure 3D), *Yuxisaurus* possessed at least 14 maxillary  
248 teeth.

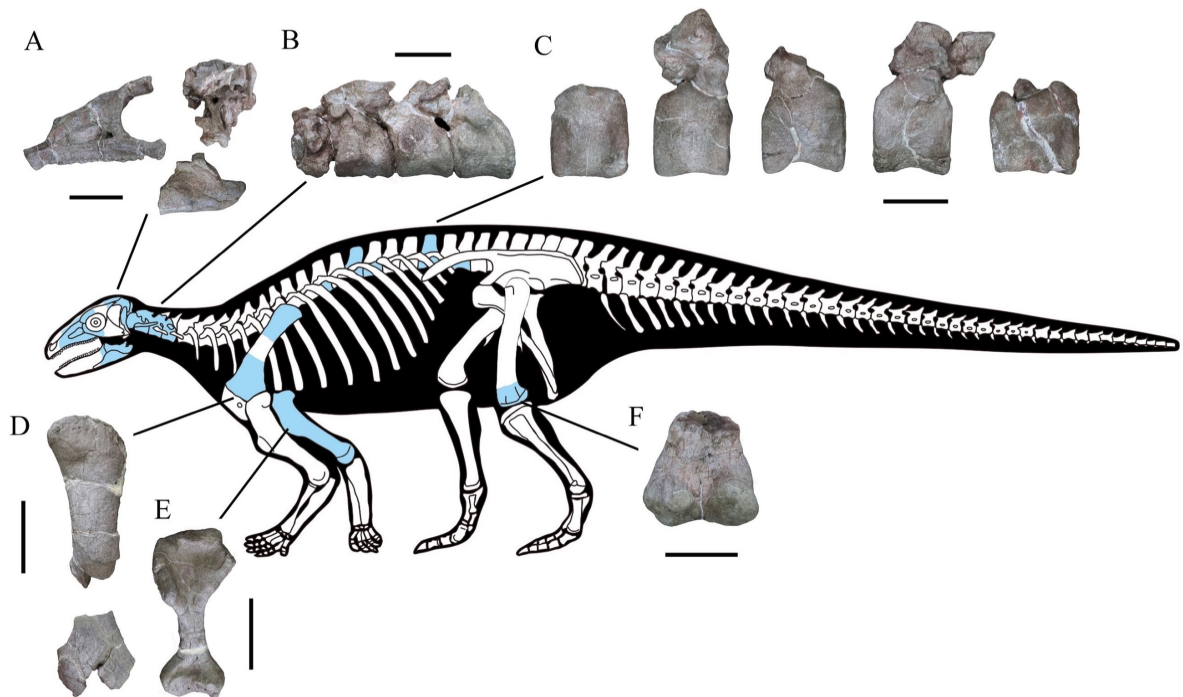

249  
250

251 **Figure 2.** Skeletal reconstruction of *Yuxisaurus kopchicki* showing some of the main preserved elements from the  
252 holotype (highlighted in blue), with details of the skull bones (A), cervical vertebrae (B), dorsal vertebrae (C), left  
253 scapula (D), right humerus (E) and left femur (F). Scale bars equal 5 cm (A–C) or 10 cm (D–F). The facial region and  
254 distal scapula are mirrored. Osteoderms have been omitted for convenience.

255

## 256 Lacrimal

257 The lacrimal lacks any discernible sutures with the surrounding bones except medially (part  
258 of its junction with the maxilla; see above) and with the palpebral (where a curved groove  
259 might mark the boundary) (Figure 3A–C). Based on comparisons with other thyreophorans,  
260 the lacrimal is inferred to comprise the anterior margin of the orbit and to contact the maxilla  
261 anteriorly and ventrally, the jugal posteroventrally, and the palpebral and prefrontal dorsally  
262 and posteriorly. The lateral surface of the lacrimal is sculptured and rugose, particularly in the  
263 region of the orbital margin. Its posterior surface (i.e., the anterior margin of the orbit) is  
264 concave and rounded in lateral view. In the border of the orbit rounded fossa is present,  
265 indicating the exit of the nasolacrimal duct. The posterior margin of the lacrimal expands  
266 medially, to form a partition that separates the orbit from the nasal cavity anteriorly (Figure  
267 3B). In medial view, this wall becomes thinner as it curves dorsally and slightly posteriorly to  
268 approach the prefrontal. The maxillary ramus of the lacrimal is an anteriorly trending triangular  
269 lamina that is concave in medial view, tapering at its anterior end. Due to the absence of  
270 recognizable sutures, it is not possible to determine the extent of the lacrimal's contribution to  
271 the antorbital fossa and fenestra.

272

## 273 ?Nasal

274 A small fragment of bone anterior to the right prefrontal might represent part of the right  
275 nasal (Figure 3A–C). However, it cannot be identified with confidence and offers no useful  
276 information.

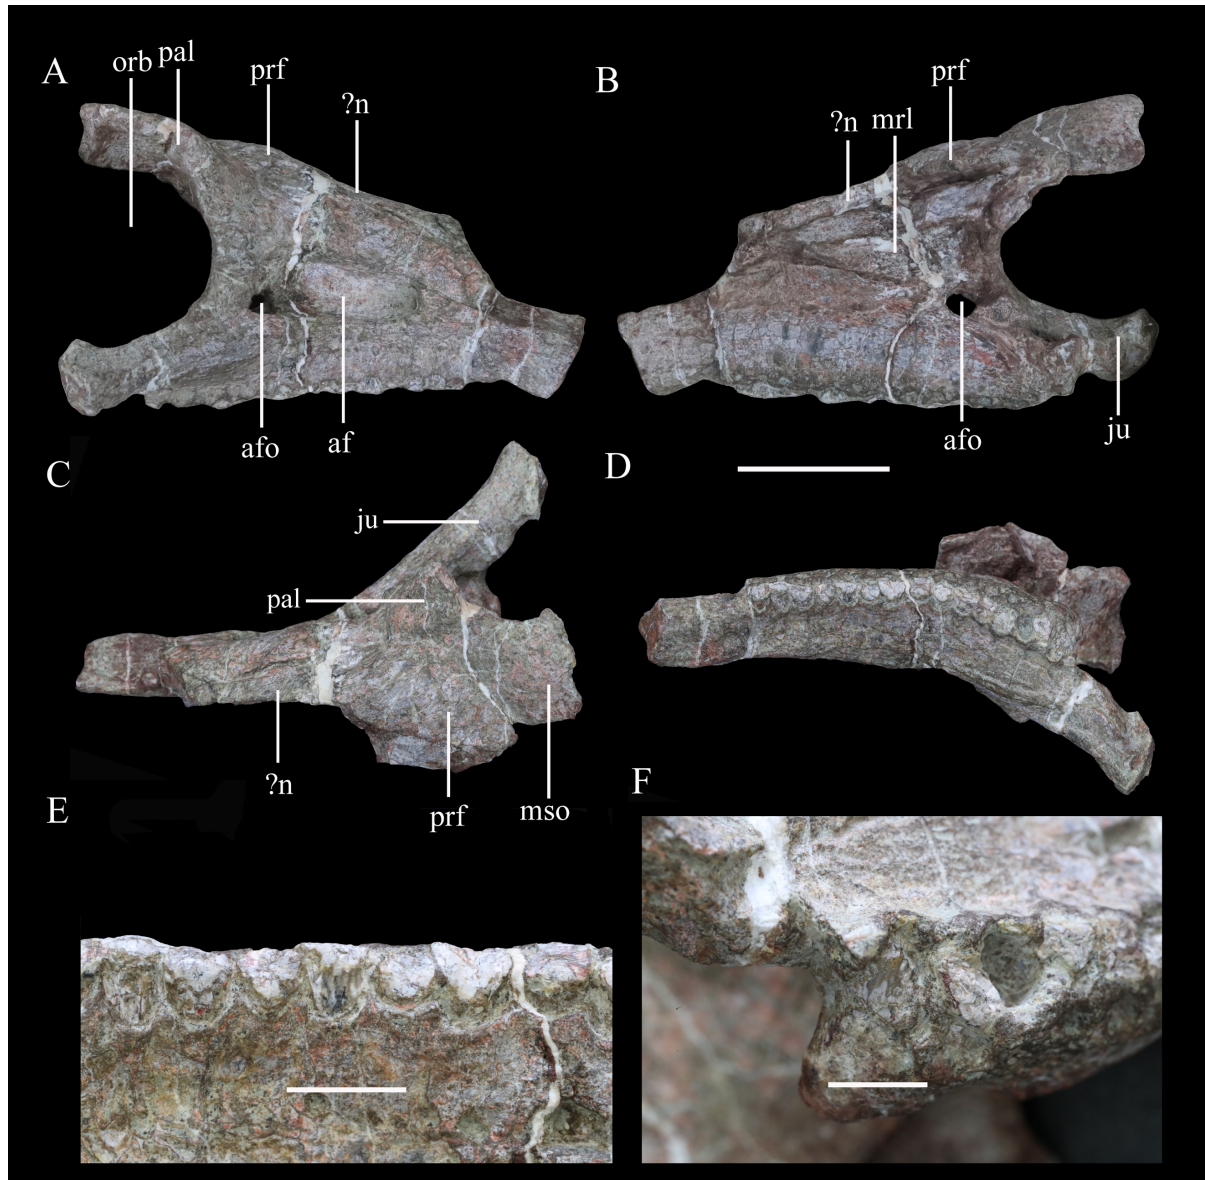

277  
278 **Figure 3.** Right maxilla of *Yuxisaurus kopchicki* in (A) lateral, (B) medial, (C) dorsal and (D) ventral views.  
279 Maxillary tooth row in (E) lingual view with the last tooth in (F) lingual view. Abbreviations: af, antorbital fossa;  
280 afo, antorbital foramen; ju, jugal; mrl, maxillary ramus of the lacrimal; mso, mesosupraorbital; orb, orbital; pal,  
281 palpebral; prf, prefrontal. Scale bar equals 5 cm.

282

### 283 Prefrontal

284 The right prefrontal roofs the nasal cavity dorsally (Figure 3A) and is flat ventrally but  
285 slightly domed in dorsal view (Figure 3C). It contacts the palpebral laterally and the middle  
286 supraorbital posteriorly. The prefrontal probably contacts the lacrimal anteriorly but this cannot  
287 be substantiated due to lack of a clear suture. A fractured bone anterior to the prefrontal, medial  
288 to the maxilla, probably belongs to the right nasal (see above).

289

### 290 Supraorbitals

291 The right palpebral (anterior supraorbital) is represented by its anterior portion only, which  
292 occupies the upper boundary of the orbit (Figure 3A). The palpebral is a narrow, elongated  
293 bone, which is co-ossified with the lacrimal anteroventrally, the prefrontal anteromedially, and  
294 the middle supraorbital medially. Viewed laterally, the palpebral curves posterodorsally from  
295 the anterodorsal margin of the orbit (Figure 3A). In dorsal view, it has a rounded anterior end



296 to contact the lacrimal, while its contact with the middle supraorbital is unclear. On the dorsal  
297 surface of the palpebral a distinct ridge extends posterodorsally (Figure 3C). The middle  
298 supraorbital is partly preserved. It bulges dorsally but is concave ventrally and contacts the  
299 prefrontal anteriorly through an anterolateral-posteromedial directed suture that turns into a  
300 groove dorsally.

301

### 302 Jugal

303 The partly preserved right jugal articulates with the maxilla and lacrimal anteriorly. In  
304 lateral or medial view, the anterior ramus of the jugal projects posteriorly and slightly ventrally,  
305 whereas in dorsal or ventral view it extends posterolaterally (Figure 3A–D). *Yuxisaurus* differs  
306 from *Emausaurus*, *Scutellosaurus* and *Scelidosaurus*, in which the anterior ramus is oriented  
307 horizontally (Haubold, 1990; Breeden and Rowe, 2020; Norman, 2020a; Breeden et al., 2021),  
308 but is more similar to several ankylosaurians, such as *Pinacosaurus*, *Gobisaurus*, *Saichania*  
309 and *Edmontonia*, where the anterior ramus projects posteroventrally (Godefroit et al., 1999;  
310 Vickaryous et al., 2001; Vickaryous 2006; Carpenter et al., 2011). The transverse cross-section  
311 of the jugal anterior ramus is rhomboidal but its posterior end is transversely compressed and  
312 dorsoventrally expanded. The posteromedial margin is inverted, leaving a dorsoventrally  
313 oriented embayment exposed in medial view.

314

### 315 Postorbital

316 The postorbital is represented only by the left squamosal process, which formed part of the  
317 supratemporal bar. This process is bullet-shaped in dorsal view with a wide anterior end and  
318 pointed posterior end (Figure 4A, B). It is rhomboidal in cross-section with a flat dorsal surface  
319 that lies lateral and dorsal to the squamosal. The postorbital formed part of the dorsal margin  
320 of the infratemporal fenestra, but no other details are visible.

321

### 322 Squamosal

323 The right squamosal is broken anteriorly and is slightly displaced medially, while the left  
324 squamosal articulates with the squamosal process of the left postorbital (Figures 4A, B, 5A,  
325 B). The squamosal is broad posteriorly, tapers anteriorly and the dorsal surface of its central  
326 body is flat (Figures 4B, 5A). Its anterodorsal process is about 35 mm long and extends  
327 anteriorly and a little ventromedially, so that in dorsal view this process lies both medial and  
328 ventral to the squamosal process of the postorbital. In ventral view, this process is transversely  
329 narrow. The left anteroventral process is missing but this feature is preserved on the right side.  
330 It is rod-like but truncated anteriorly, and its dorsal part encloses a deep oval sulcus on the  
331 lateral surface (Figure 4A, B). The posteromedial process is dorsoventrally tall, merging with  
332 the squamosal process of the parietal posteriorly without a discernible suture on the posterior  
333 wall of the supratemporal fenestra. In medial view, at the base of the squamosal central body,  
334 is a fossa that is much broader on the right side than on the left. In lateral view, a similar but  
335 deeper recess is situated at the base of the squamosal central body to receive the quadrate head  
336 (Figure 4A, B). Posteriorly a short vertical process of the squamosal abuts the anterior surface  
337 of the paroccipital process (Figure 4). Viewed posteriorly, the squamosal is exposed dorsally,  
338 but it is positioned only slightly higher than the paroccipital process, as also occurs in  
339 *Lesothosaurus* (Serenó, 1991). By contrast, the squamosal has a much greater exposure in  
340 posterior view in *Scelidosaurus* and ankylosaurians (Vickaryous et al., 2004; Norman, 2020a),  
341 although the degree of exposure varies among stegosaurs (Gilmore, 1914; Sereno and Dong,  
342 1992).

343 In dorsal view, the squamosal forms most of the medial margin of the large supratemporal  
344 fenestra, as well as its posterior corner. Although the boundaries of neither supratemporal  
345 fenestra are complete, the preserved portion on the left-hand side of the skull suggests that it



346 had an ovate to subtriangular outline similar to that of *Emausaurus* (Haubold, 1990) and  
 347 *Scelidosaurus* (NHMUK PV R1111; Norman, 2020a). The squamosal also formed the  
 348 posterodorsal corner of an open infratemporal fenestra (Figure 5A).  
 349

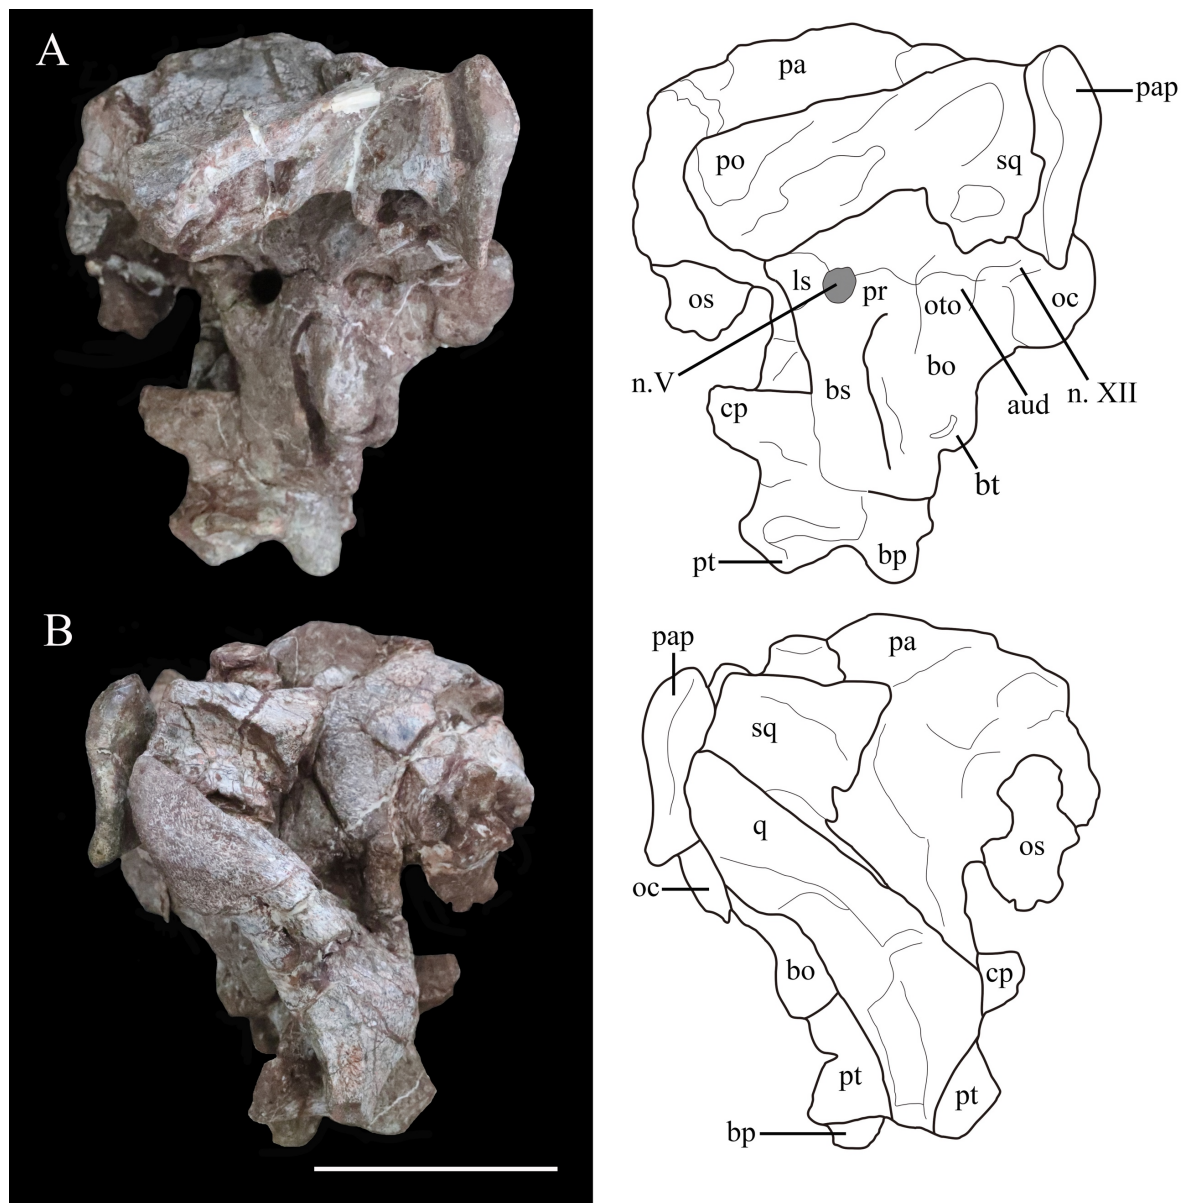

350  
 351  
 352 **Figure 4.** Photographs (left) and line drawings (right) of the braincase and partial skull roof of *Yuxisaurus*  
 353 *kopchicki* in left lateral (A) and right lateral (B) views. Abbreviations: aud, auditory recess; bo, basioccipital; bp,  
 354 basipterygoid process; bs, basisphenoid; cp, cultriform process (parasphenoid rostrum); fm, foramen magnum; ls,  
 355 laterosphenoid; n. V, exit of trigeminal nerve; n. XII, exit of cranial nerve XII; oc, occipital condyle; os,  
 356 orbitosphenoid; oto, otoccipital; pa, parietal; pap, paroccipital process; po, postorbital; pr, prootic; pt, pterygoid;  
 357 q, quadrate; sq, squamosal. Scale bar equals 5 cm.

### 358 359 Quadrate

360 The right quadrate is partly preserved with its ventral-most part missing and the quadrate  
 361 head is displaced from the squamosal recess. In lateral view, the posterior margin of the  
 362 quadrate is sinuous, being convex in its dorsal part but inflected at a point around one-third of  
 363 its length so that ventral to this the rest of this margin is shallowly concave (Figure 4B). In  
 364 posterior view, the proximal quadrate bears a strong, curved crest. Although the ventral part is

365 missing, it seems to curve ventromedially based on the remaining shaft. The pterygoid wing is  
366 laminar and extends anteromedially from the middle of the shaft to meet the quadrate ramus of  
367 the pterygoid (Figures 4B, 5B). A large oval depression occupies the medial surface of the  
368 pterygoid wing, as in *Scelidosaurus* (Norman, 2020a).

369

### 370 Parietal

371 The parietal fuses with its counterpart to form an hourglass-shaped compound bone in  
372 dorsal view that bears a prominent sagittal crest (Figure 5A). The parietal fuses fully with the  
373 laterosphenoid anteroventrally and the prootic posteroventrally with no traceable boundaries  
374 between them. The posterior portion of the right parietal is damaged. The smooth lateral  
375 surfaces are concave anteroposteriorly but convex transversely, and curve outward to form a  
376 short anterolateral process. In lateral view, the parietal extends to a level much higher than the  
377 squamosal (Figure 4B), in contrast to *Scelidosaurus* and stegosaurs in which the parietal is  
378 either only slightly elevated or at the same level (Gilmore, 1914; Sereno and Dong, 1992;  
379 Norman, 2020a). A deep sulcus is present on the main body of the left parietal close to the  
380 junction between the left medial and posterior supratemporal walls (Figure 5A), but this is not  
381 visible on the right-hand side, where it is concealed by the displaced squamosal. The parietal  
382 forms the medial boundary of the open supratemporal fenestra.

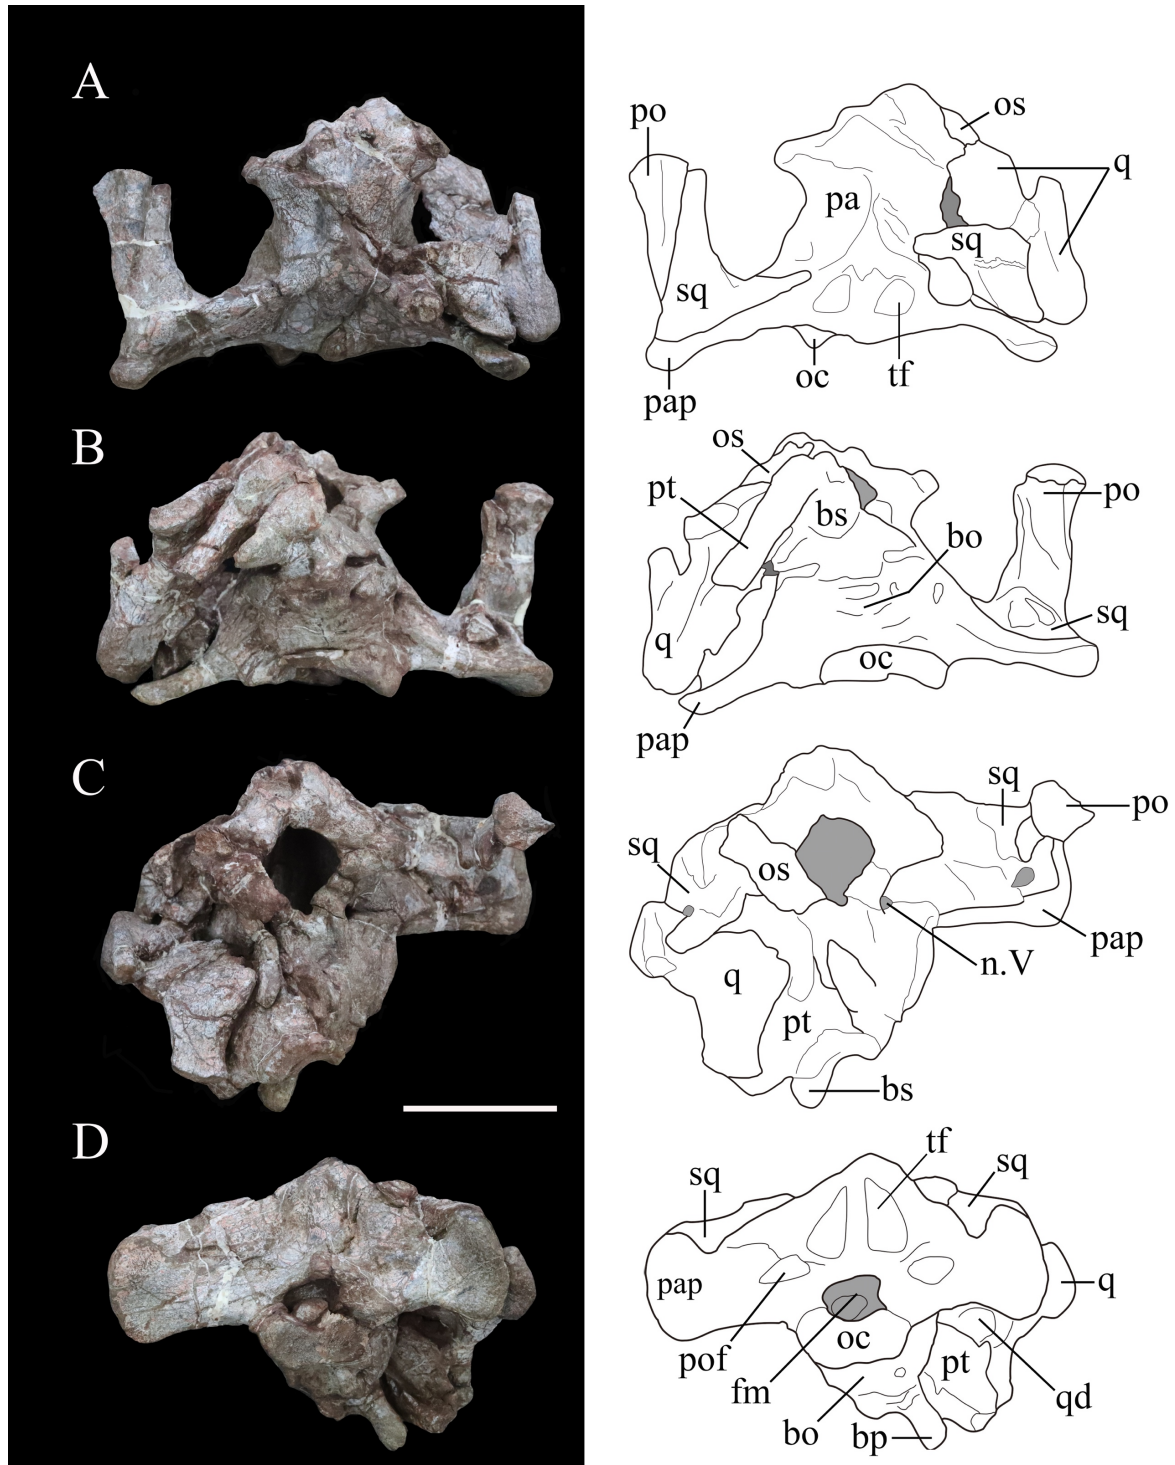

383  
 384 **Figure 5.** Photographs (left) and line drawings (right) of the braincase of *Yuxisaurus kopchicki* in (A) dorsal, (B)  
 385 ventral, (C) anterior and (D) posterior views. Abbreviations: bo, basioccipital; bp, basipterygoid process; bs,  
 386 basisphenoid; cp, cultriform process (parasphenoid rostrum); fm, foramen magnum; n. V, exit of trigeminal nerve;  
 387 oc, occipital condyle; os, orbitosphenoid; pa, parietal; pap, paroccipital process; po, postorbital; pt, pterygoid; q,  
 388 quadrate; qd, quadrate depression; sq, squamosal. Scale bar equals 5 cm.

389

### 390 Pterygoid

391 The pterygoid is partially preserved on the right side and is situated between the quadrate  
 392 and the basipterygoid process of the basisphenoid. In posterior view, its quadrate ramus is a  
 393 fan-shaped lamina that extends laterodorsally to meet the pterygoid wing of the quadrate



394 (Figure 5D). Its ventral margin curls dorsally to form a narrow trough that is visible in posterior  
395 view as in *Lesothosaurus* and *Scelidosaurus* (Sereno, 1991; Norman, 2020a).

396

### 397 ?Skull roof fragment

398 A broken plate-like element is tentatively identified as part of the skull roof, but it is unclear  
399 how it relates to the other cranial elements (Figure 6). Its most conspicuous feature is its wave-  
400 like surface texture, which is due to its domed external surface combined with the presence of  
401 a channel-like depression. This feature might be unique to *Yuxisaurus*, since the skull roof is  
402 generally flat in other thyreophorans (e.g., Haubold, 1990; Sereno and Dong, 1992; Norman,  
403 2020a). However, given its uncertain identification this element is not considered further  
404 herein.

405

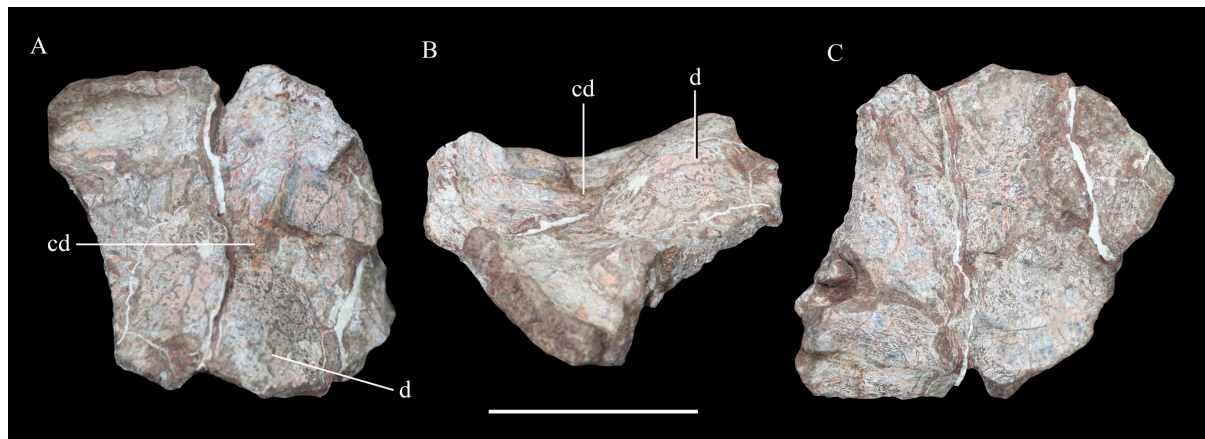

406

407 **Figure 6.** Possible skull roof fragment of *Yuxisaurus kopchicki* in (A) dorsal, (B) lateral and (C) ventral views.

408

Abbreviations: cd, channel-like depression; d, dome. Scale bar equals 5 cm.

409

### 410 Braincase

411 The occipital portion of the skull is well preserved and its broadest part reaches a maximum  
412 width of approximately 134 mm (measured between the distal ends of the paroccipital  
413 processes). This is comparable to that of *Scelidosaurus* (NHMUK PV R1111: c. 120 mm; N.B.  
414 the scale bar given in Norman [2020a, fig. 33] is incorrect, implying that this skull is twice as  
415 large as it is) and the Late Jurassic ankylosaurian *Gargoyleosaurus* (154 mm; Carpenter et al.,  
416 1998) but is substantially greater than the estimated total skull width of *Emausaurus* (83 mm;  
417 Haubold, 1990). In posterior view, the occipital bones appear to be completely fused with each  
418 other, and the junctions between them are obscured (Figure 5D). The dorsal half of the occiput  
419 is strongly inclined anteriorly. A robust nuchal crest immediately dorsal to the foramen  
420 magnum extends vertically to meet the parietal (Figure 5D) and is flatter and wider than that  
421 present in *Scelidosaurus* (NHMUK PV R1111; Norman, 2020a). A deep dorsoventrally  
422 elongated, subtriangular depression is present on each side of the nuchal crest, excavating the  
423 posterior surface of the supraoccipital (Figure 5D), likely representing an insertion area for the  
424 neck musculature. By contrast, the corresponding area in *Scelidosaurus* is very shallowly  
425 concave and coarsely textured (NHMUK PV R1111; Norman, 2020a). The same region bears  
426 only a shallow concavity in ankylosaurians (e.g., *Gargoyleosaurus*, *Pawpawsaurus* and  
427 *Euoplocephalus*) and in stegosaurs, this depression is shallow in *Huayangosaurus* and deep  
428 and subquadrate in *Stegosaurus* (Gilmore, 1914; Sereno and Dong, 1992; Lee, 1996; Carpenter  
429 et al., 1998; Vickaryous and Russell, 2003; Norman, 2020a). Consequently, these large,  
430 teardrop-shaped fossae are a potential autapomorphy of *Yuxisaurus*.

431

Dorsolateral to the foramen magnum, at the base of each paroccipital process, there is a  
432 broad fossa for the reception of the proatlas (Figure 5D). A pair of short, rough ridges diverge

433 dorsolaterally from the dorsal midline of the foramen magnum and separate the proatlantal  
434 fossae from the parasagittal depressions adjacent to the nuchal crest (Figure 5D). The  
435 paroccipital process of *Yuxisaurus* is strap-like, extending laterally and slightly posteriorly  
436 from each side of the foramen magnum, as in some ankylosaurians (such as *Pinacosaurus*:  
437 Maryanska, 1971) and stegosaurs (such as *Stegosaurus*: Gilmore, 1914), whereas in  
438 *Scelidosaurus* (NHMUK PV R1111; Norman, 2020a) and some ankylosaurians the  
439 paroccipital process extends ventrolaterally (Vickaryous et al., 2004). In *Yuxisaurus*, the  
440 ventral margin of the paroccipital process is straight on the left side but slightly concave on the  
441 right side (Figure 5D). The distal end of the process is dorsoventrally expanded but is  
442 asymmetrical, so that most of this expansion occurs dorsally rather than ventrally. This  
443 asymmetrical expansion creates a distinct, ‘V’-shaped notch on the dorsal margin of the  
444 paroccipital process (Figure 5D). This notch appears to be unique to *Yuxisaurus* and is regarded  
445 as autapomorphic. By contrast, this margin is subtly concave in *Scelidosaurus* (NHMUK PV  
446 R1111; Norman, 2020a), convex in the early-diverging ornithischian *Lesothosaurus* (Serenó,  
447 1991) and is straight or slightly convex in stegosaurians and ankylosaurians (Gilmore, 1914;  
448 Sereno and Dong, 1992; Vickaryous et al., 2004; Norman, 2020a). On the left paroccipital  
449 process, at about the same level as the concavity, lies a tongue-like slit, resembling the  
450 condition in *Scelidosaurus*, where a spur-like process indicates the position of the posttemporal  
451 fenestra (NHMUK PV R1111; Norman, 2020a). However, this feature is absent on the right-  
452 hand side, which might be the result of taphonomic distortion. The paroccipital process  
453 contacts the squamosal anterodorsally and the quadrate anteroventrally but is not fused with  
454 them, similar to the condition in *Scelidosaurus* (NHMUK PV R1111; Norman, 2020a) and  
455 stegosaurs (Gilmore, 1914; Sereno and Dong, 1992), but differing from ankylosaurs like  
456 *Gargoyleosaurus*, *Talarurus*, *Pinacosaurus*, *Tarchia* and *Euoplocephalus* in which these  
457 bones are fused (Godefroit et al., 1999; Vickaryous and Russell, 2003; Brandon and Carpenter,  
458 2005). In lateral view, the distal end of paroccipital process is sinuous, with its thin ventral  
459 half curving posteriorly but the thick dorsal half anteriorly (Figure 4A, B).

460 The foramen magnum is sub-elliptical in outline, with its long axis extending horizontally.  
461 The aperture contains a rounded fragmentary bone, which probably represents the axial  
462 odontoid process. The occipital condyle was broken when separated from the cervical series,  
463 but its remaining portion suggests that it had a reniform outline, as also occurs in *Scelidosaurus*  
464 (NHMUK PV R1111; Norman, 2020a). Due to fusion, the relative contributions of the  
465 basioccipital and exoccipital to the boundaries of the foramen magnum cannot be determined.

466 In lateral view, the occipital condyle is set on a short neck and the ventral margin of the  
467 basioccipital curves anteroventrally (Figure 4A). Anterior to the occipital condyle, the ventral  
468 surface of the basioccipital is generally smooth but bears some irregular pits. The basioccipital  
469 expands laterally and especially ventrally to form prominent, rounded basal tubera, which are  
470 strongly offset ventrally with respect to the long axis of the occipital condyle (Figure 4A). This  
471 gives the posteroventral corner of the braincase a dorsoventrally deep, ‘stepped’ appearance in  
472 lateral view. By contrast, the basal tubera lie at the same level as, or slightly dorsal to, the  
473 occipital condyle in *Scelidosaurus* (NHMUK PV R1111; Norman, 2020a) and *Emausaurus*  
474 (Haubold, 1990). In ankylosaurs and stegosaurs, the basal tubera project only a short distance  
475 ventral to the occipital condyle (e.g., Gilmore, 1914; Maryanska, 1977; Sereno and Dong,  
476 1992; Vickaryous et al., 2004) and it seems likely that the deep, ‘stepped’ basal tubera of  
477 *Yuxisaurus* are an autapomorphy. The basal tubera are widely separated in ventral view in  
478 *Yuxisaurus*, as also occurs in *Scelidosaurus* (NHMUK PV R1111; Norman, 2020a). However,  
479 the new taxon lacks the prominent midline ridge that lies between the basal tubera in  
480 *Scelidosaurus* (NHMUK PV R1111; Norman 2020a). Dorsal to the basal tubera is a recess  
481 delineated by a sharp ridge anteriorly and another one posteriorly, which represents the otic  
482 region containing the fenestra ovalis and that is presumably formed by the otooccipital (Figure



483 4A) although bone boundaries in this region are impossible to assess due to fusion. Posterior  
484 to this recess, and bounded by the occipital condyle posteriorly, is another smaller recess,  
485 which is inferred to have contained the exits of cranial nerves IX–XI (the glossopharyngeal  
486 [IX], accessory [XI] and vagus nerves [X]). However, all of these inferred foramina are  
487 completely concealed by matrix and cannot be identified (Figure 4A).

488 The basisphenoid is preserved but is broken ventrally on its left-hand side. As in other  
489 thyreophorans, it is anteroposteriorly short in comparison with the basioccipital. Its base forms  
490 a gently curved shelf, posterolateral to which the anteroposteriorly compressed basipterygoid  
491 processes are directed ventrolaterally in posterior view and slightly posteriorly in lateral view  
492 (Figures 4A, 5D). The basipterygoid processes are situated considerably lower than the basal  
493 tubera in both lateral and posterior views, creating an additional ‘step’ in the posterior margin  
494 of the braincase (Figures 4A, 5D). This differs from the conditions in *Scelidosaurus* (NHMUK  
495 PV R1111; Norman, 2020a), *Emasaurus* (Haubold, 1990), stegosaurs (e.g., Gilmore, 1914;  
496 Galton, 1988; Sereno and Dong, 1992) and ankylosaurs (e.g., Maryanska, 1977; Vickaryous et  
497 al., 2004), in which these processes only extend for a short distance ventrally with respect to  
498 the occipital condyle and are poorly exposed in posterior view, and this probably represents an  
499 additional autapomorphy of *Yuxisaurus*. Although the left basipterygoid process is missing, the  
500 processes appear to have been separated by an angle of 30° (Figure 5D), whereas this angle is  
501 closer to 60° in *Scelidosaurus* (NHMUK PV R1111; Norman, 2020a).

502 The basipterygoid and parasphenoid are fused indistinguishably and the cultriform process  
503 is lentiform in transverse cross-section. It protrudes anterodorsally for a short distance, but its  
504 anterior portion is broken (Figure 4A). As with other features of the basicranium, the cultriform  
505 process is ventrally offset with respect to the occipital condyle, contributing to the deep,  
506 stepped appearance of the braincase in lateral view (Figure 4A). In *Lesothosaurus* (NHMUK  
507 PV RU B17; Porro et al., 2015), *Scelidosaurus* (NHMUK PV R1111; Norman, 2020a) and  
508 *Huayangosaurus* (Sereno and Dong, 1992), the cultriform process and occipital condyle are in  
509 approximately the same plane.

510 The junction between the basisphenoid and prootic cannot be determined, but the presence  
511 of the latter can be inferred from the position of a large, teardrop-shaped foramen on the lateral  
512 surface of the braincase, which is inferred to be the exit for cranial nerve V (trigeminal: Figure  
513 4A). Similarly, at least a portion of the laterosphenoid is present anterior to this opening,  
514 although no sutures are visible in this region. The braincase is open anteriorly, revealing the  
515 endocranial cavity, which is vertically expanded and has a rounded, smooth inner surface  
516 (Figure 5C). A bone fragment attached to the anterior border of the right laterosphenoid is  
517 identified as the right orbitosphenoid. Ossified orbitosphenoids are also present in  
518 *Scelidosaurus* (NHMUK PV R1111; Norman, 2020a), ankylosaurs (Maryanska, 1977;  
519 Vickaryous et al., 2004) and stegosaurs (Gilmore, 1914).

520

## 521 Mandibles

522 The post-dentary portions of both mandibles are preserved, including the angulars,  
523 surangulars, prearticulars and articulars (Figure 7).

524 In lateral view, the ventral margin of the angular is very slightly concave, but its posterior  
525 part curves posterodorsally at an angle of approximately 155°, as in *Scelidosaurus* (Norman,  
526 2020a). The angular is tallest anteriorly but tapers posteriorly and has an almost straight dorsal  
527 margin that turns abruptly dorsally close to its posterior end (Figure 7A). The elongated,  
528 upturned posterior process of the angular is not present in either *Emasaurus* (Haubold, 1990)  
529 or *Scelidosaurus* (NHMUK PV R1111; Norman, 2020a) and appears to be unique to  
530 *Yuxisaurus* among early-branching thyreophorans; it is regarded as a potential autapomorphy  
531 herein. Viewed ventrally, the angular of *Yuxisaurus* has a tapering posterior terminus (Figure  
532 7B), and the sinuous suture with the prearticular extends along the ventral margin, which can

533 only be seen beneath the adductor fossa in medial view (Figure 7C, G). The smooth lateral  
534 surface bulges laterally at its centre, which is more prominent on the right side, but the ventral  
535 surface is generally flat.

536 In lateral view, the surangular has subparallel dorsal and ventral margins. Both margins are  
537 horizontal and straight posteriorly, but curve anterodorsally anteriorly (Figure 7A). Along the  
538 dorsal border immediately anterior to this inflexion is a dorsally extending process, with a sharp  
539 dorsal margin that also bulges slightly laterally. On the left surangular, the anterior portion of  
540 this process curves medially while the posterior portion is missing. By contrast, this process is  
541 oddly shaped on the right side, having a broad, subtriangular base with a transversely wide but  
542 anteroposteriorly compressed process that is posterodorsally directed (Figure 7E, H). Further  
543 anteriorly, the dorsal margin of the surangular expands transversely, to roof the adductor fossa  
544 medially and laterally to overhang the lateral surface. In lateral view, this dorsal expansion  
545 extends anterodorsally, whereas it is generally horizontal in *Emausaurus* and *Scelidosaurus*  
546 (Haubold, 1990; Norman, 2020a). The surface ventral to the lateral overhang is broadly  
547 depressed, and its posterodorsal corner is pierced by a foramen (Figure 7E). This foramen is  
548 prominent on the right mandible but cannot be identified on the left side. Further anteriorly,  
549 the surangular dorsal margin forms a dorsal apex. Its medial margin is higher than its lateral  
550 margin in dorsal view, so that its dorsal surface is oriented laterally. This apex, presumably the  
551 highest point of the mandible, flattens anterolaterally and the dorsal surface anterior to this  
552 apex is generally flat. Immediately beneath this apex the lateral surface bulges strongly laterally  
553 (Figure 7E). In medial view, the surangular encloses the ovoid adductor fossa dorsally and  
554 posteriorly (Figure 7G). The inner surface of the adductor fossa is smooth but it bears an  
555 irregular vertical ridge in the centre of its ventral half (Figure 7G). As with the articular surface  
556 of the mandible, the surangular curves medially posteriorly and expands medially to form an  
557 elevated platform relative to the articular surface, and then shrinks abruptly, tapering  
558 posteromedially (Figure 7D, H). At the inflection point of this process the lateral surface bulges  
559 laterally, posterior to which the lateral surface bears an anterolaterally-posteromedially  
560 elongated depression that is prominent on both mandibles (Figure 7A, E).

561 In medial view, the prearticular forms the ventral margin of the adductor fossa. Its dorsal  
562 margin is concave and sharp, but is interrupted by a rounded process that lies slightly posterior  
563 to the middle of the fossa, as also occurs in *Scelidosaurus* (Norman, 2020a). The prearticular  
564 presumably contributed to the posterior margin of the adductor fossa, but the extent of this  
565 cannot be recognized in this specimen. Adjacent to the posterior margin, the prearticular bears  
566 a dorsal concavity, which expands laterally to form a broad, flattened articular surface that  
567 meets the surangular laterally (Figure 7C, G). Sutures are difficult to determine in this region  
568 but it seems likely that the prearticular extended posteriorly to the end of the mandible and  
569 completely fused with the surangular ventrally.

570 The articular is completely fused with the surrounding bones so its original outline is  
571 unknown. Nevertheless, in dorsal view the articular bears a concavity medially, which is  
572 broader on the right mandible than on the left (Figure 7D, H). Anterior to this concavity, the  
573 articular has a dorsal pyramidal process. Posteriorly the articulars have different shapes on  
574 different sides, as the right articular possesses a mediadorsal flange with a flat dorsal surface,  
575 while the left articular has a vertical flange and bears a deep fossa on the dorsal surface (Figure  
576 7D, H).

577 A bone fragment in the anterodorsal corner of the adductor fossa of the right mandible might  
578 represent part of a coronoid, but further information is unavailable due to poor preservation.

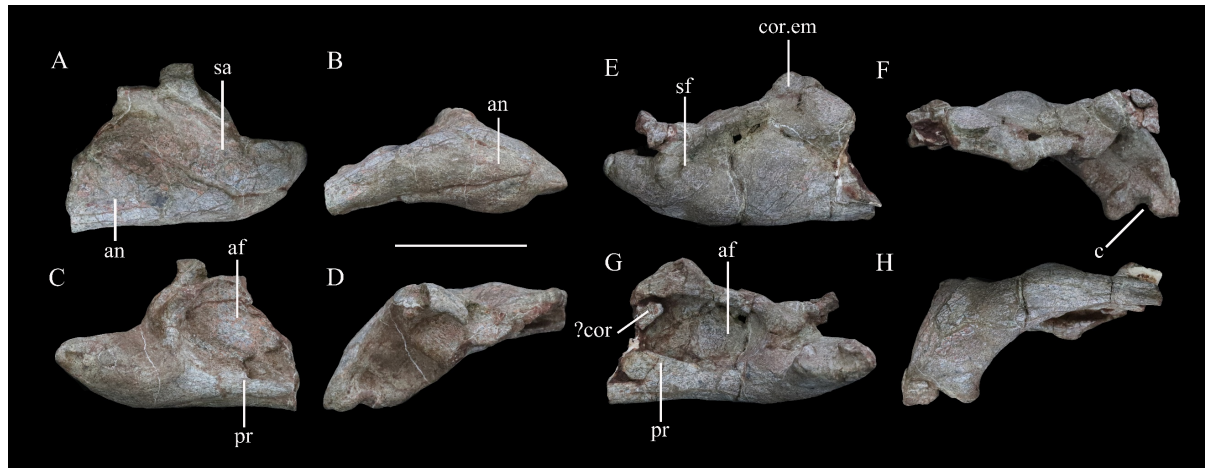

579  
580 **Figure 7.** Mandibular remains of *Yuxisaurus kopchicki*. Posterior part of left mandible in (A) lateral, (B) ventral,  
581 (C) medial and (D) dorsal views. Posterior part of right mandible in (E) lateral, (F) ventral, (G) medial and (H)  
582 dorsal views. Abbreviations: an, angular; af, adductor fossa; c, concavity; cor, coronoid; cor.em, coronoid  
583 eminence; pr, prearticular; sa, surangular; sf, surangular foramen. Scale bar equals 5 cm.

584

## 585 Dentition

586 Most of the maxillary tooth crowns were abraded away accidentally during preparation  
587 (Figure 3E). The alveolar sockets are elliptical and slightly expanded transversely (Figure 3D).  
588 Most of the teeth are similar in size except for the seventh, eighth, tenth and eleventh teeth,  
589 which appear to be slightly larger on the basis of their cross sections (approximately 5 mm  
590 labiolingually by 7 mm mesiodistally). The best-preserved tooth is the posterior-most one,  
591 which is embedded in its socket. This tooth crown is triangular in lingual view and has coarsely  
592 denticulate mesial and distal margins (Figure 3F). Its lingual and labial surfaces are ornamented  
593 with multiple (at least four) pairs of vertical ridges lying in parallel to each another, which  
594 extend to the ventral margin of the crown and support the marginal denticles. These ridges are  
595 narrow but densely packed and are almost evenly distributed over the crown surface. The tooth  
596 differs from those of *Lesothosaurus* and *Scutellosaurus*, which lack ridges on the crown surface  
597 (Colbert, 1981; Sereno, 1991; Breeden et al., 2021), and those of *Emausaurus* and  
598 *Scelidosaurus*, which have only incipient fluting and ridges (Haubold, 1990; Norman, 2020a;  
599 NHMUK PV R1111). However, the teeth of many ankylosaurs (Vickaryous et al., 2004) and  
600 stegosaurs (Galton and Upchurch, 2004) do bear numerous ridges, although *Yuxisaurus* lacks  
601 the prominent primary ridge that is often present in stegosaurs as well as the rounded denticles  
602 usually present in the latter clade.

603

## 604 Axial skeleton

605 An articulated series of the four anterior-most cervical vertebrae is present and well  
606 preserved (Figure 8). Originally, these vertebrae were articulated with the occiput, but they  
607 were separated during preparation. Five isolated dorsal vertebrae of varying preservation are  
608 also present (Figure 9). They are not articulated and their exact sequence cannot be confirmed  
609 due to the variation in vertebral morphology and proportions that occurs along the dorsal series  
610 of other thyreophoran dinosaurs. However, we attempt to place them in relative order herein.



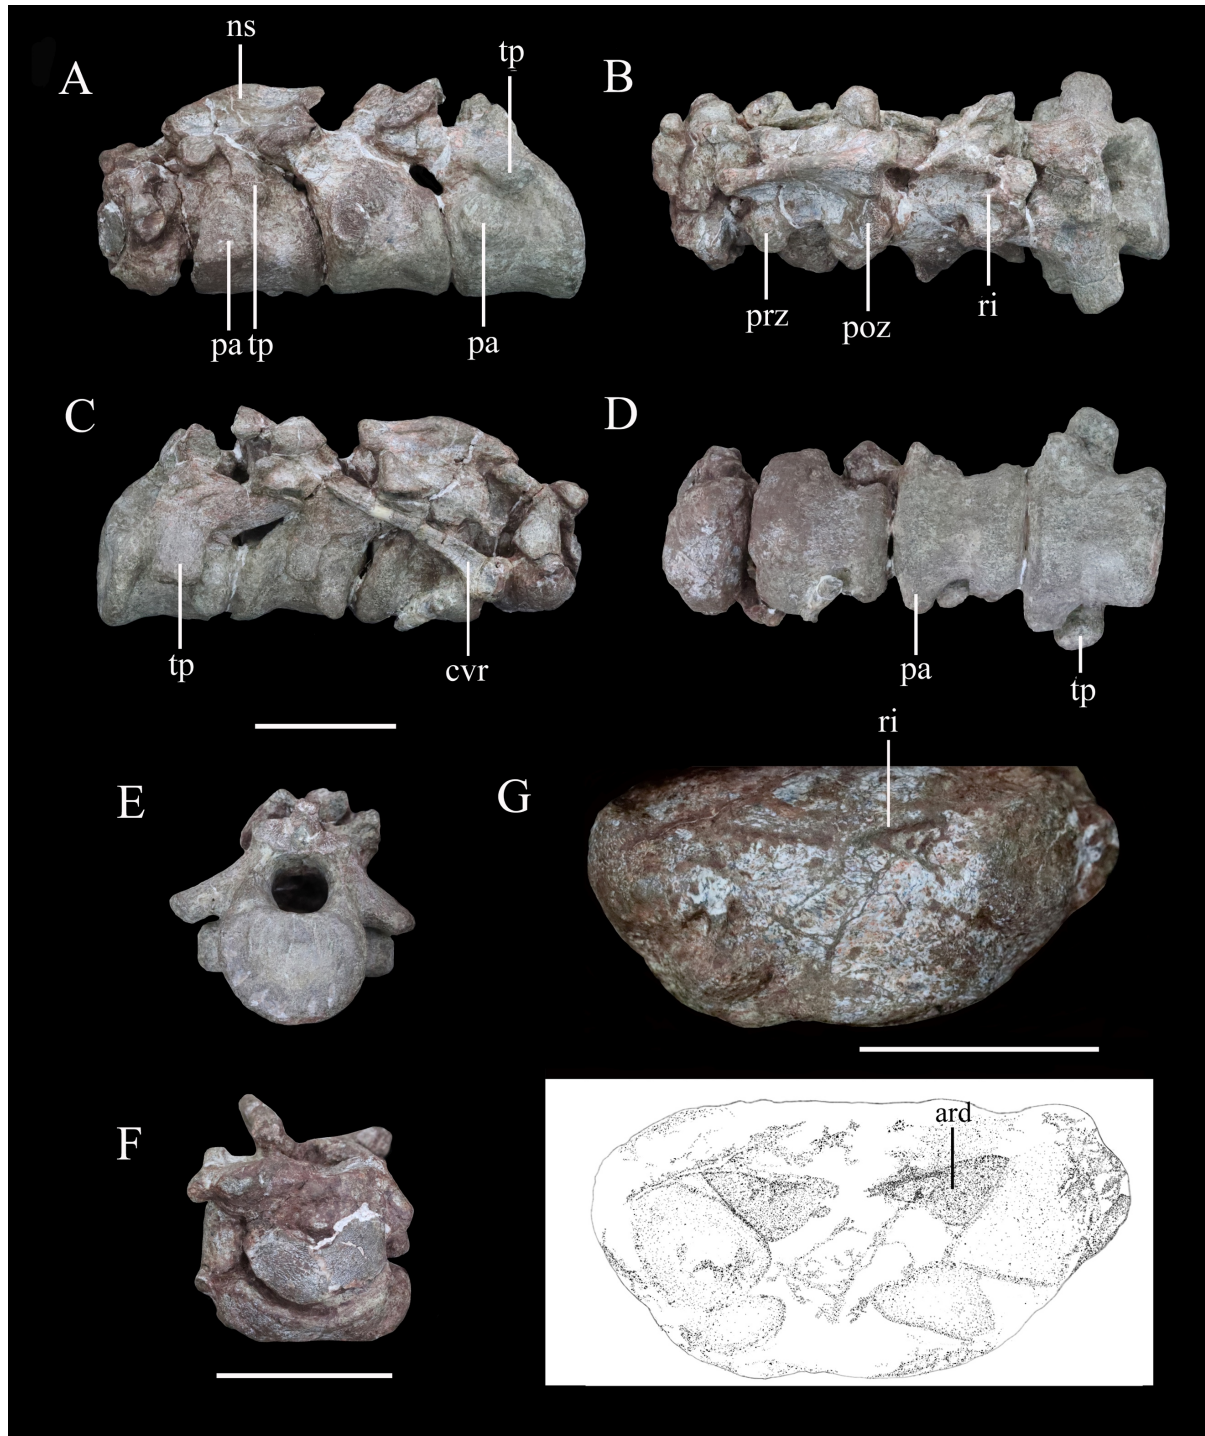

611  
612 **Figure 8.** Articulated series of the anterior-most cervical vertebrae (atlas, axis and cervicals 3 and 4) of *Yuxisaurus*  
613 *kopchicki* in (A) left lateral, (B) dorsal, (C) right lateral, (D) ventral, (E) posterior and (F) anterior views. Atlas in  
614 (G) ventral view with interpretative diagram beneath. Abbreviations: cvr, cervical rib; ns, neural spine; pap,  
615 parapophysis; poz, postzygapophysis; prz, prezygapophysis; ri, ridge; tp, transverse process. Scale bar equals 5  
616 cm.

617

### 618 Cervical vertebrae and ribs

619 The atlas is comprised of a ventral intercentrum and a pair of dorsal neural arches (Figure 8A–  
620 D, F, G). In anterior view, the atlas is rotated clockwise through 30° with respect to the other  
621 preserved vertebrae (Figure 8F). It is much wider transversely than long anteroposteriorly  
622 (Table 1). The intercentrum is crescentic to reniform in outline in anterior view and possesses  
623 an anterior articular surface that is broadly concave and faces anterodorsally (Figure 8F). A

624 massive but short swelling is present on either side of the lateral surface that is directed  
625 ventrally and laterally, anterior to which is a low anterodorsally directed ridge (Figure 8F, G).  
626 This ridge is separated from the swelling by a distinct anterodorsally directed trough. Viewed  
627 ventrally, a pair of arrow-like depressions, which point posterolaterally, occupies the posterior-  
628 most surface of the intercentrum to form sharp posterior margins (Figure 8G). This feature  
629 appears to be unique to *Yuxisaurus* and are absent in *Scelidosaurus* (NHMUK PV R1111;  
630 Norman, 2020b) and *Scutellosaurus* (Breedon and Rowe, 2020; Breedon et al., 2021). In  
631 contrast to *Yuxisaurus*, the ventral surface of the atlantal intercentrum in *Stegosaurus* bears two  
632 posterolaterally directed ridges and a subtle midline ridge separating two cavities (Maidment  
633 et al., 2015). The left neural arch is incompletely preserved but resembles closely the right one  
634 where preserved. The right pedicle is cylindrical, with an expanded ventral base articulating  
635 with the intercentrum. The postzygapophysis is a thin plate, extending posterodorsally, as in  
636 *Scelidosaurus* (NHMUK PV R1111; Norman, 2020b) and *Gastonia* (Kinneer et al., 2016), but  
637 its lateral margin bulges and thickens. A small plate above the neural arch probably represents  
638 the proatlas.

639 The axial centrum is massive and approximately equally long and wide (Figure 8A, C, D).  
640 Viewed laterally both its anterior and posterior articular surfaces are inclined anteriorly, giving  
641 it a trapezoidal outline (Figure 8A, C). Its anterior articular surface is strongly concave but the  
642 posterior surface appears to be flatter. The anteroventrally placed triangular parapophysis is  
643 prominent, expanding laterally, posterior to which a distinct depression extends over the lateral  
644 surface (Figure 8A). The ventral surface of the centrum is smooth, with a rounded ridge in the  
645 centre that is flanked by oblique surfaces laterally (Figure 8D), similar to the condition in  
646 *Scutellosaurus* (Breedon et al., 2021). By contrast, the axial centra of *Scelidosaurus* (NHMUK  
647 PV R1111; Norman, 2020b), *Stegosaurus* (NHMUK PV R36730; Maidment et al., 2015) and  
648 *Gargoyleosaurus* (Brandon and Carpenter, 2005) all bear a midline keel. In lateral view, the  
649 left diapophysis is directed ventrally (Figure 8A) but its tip is separated from the parapophysis  
650 by an anterodorsally extending trough. The right diapophysis is concealed by a cervical rib and  
651 surrounding matrix. In other thyreophorans, such as *Scelidosaurus* (NHMUK PV R1111;  
652 Norman, 2020b), *Stegosaurus* (NHMUK PV R36730; Maidment et al., 2015) and *Sauropelta*  
653 (Vickaryous et al., 2004), the diapophysis is directed ventrally but also slightly laterally and  
654 can be seen in ventral view. Both of the prezygapophyses curve laterally and ventrally and bear  
655 slightly convex articular facets (Figure 8A, B). Due to rotation of the atlas (see above), the  
656 right prezygapophysis of the axis does not articulate with the corresponding atlantal  
657 postzygapophysis. The postzygapophysis expands and diverges laterally to a greater degree  
658 than the prezygapophysis in dorsal view (Figure 8B). Its articular facet faces ventrally and is  
659 slightly concave as in ankylosaur *Sauropelta* (Vickaryous et al., 2004), but differs from  
660 *Scelidosaurus* in which the articular facet faces ventrolaterally (NHMUK PV R1111; Norman,  
661 2020b). A flat lamina above the diapophysis connects the base of the prezygapophysis  
662 anteriorly and the postzygapophysis posteriorly. The thick neural spine extends  
663 anteroposteriorly with a mild anterior transverse expansion but flares posteriorly where the  
664 postzygapophysis meets the spine on either side. In *Scelidosaurus* (NHMUK PV R1111;  
665 Norman, 2020b) the anterior transverse expansion is much more prominent than in *Yuxisaurus*,  
666 whereas in the ankylosaur *Sauropelta* (Vickaryous et al., 2004) and the stegosaur *Stegosaurus*  
667 (NHMUK PV R36730; Maidment et al., 2015), this expansion appears to be mild. In lateral  
668 view, the dorsal margin of the axial neural spine is sinusoidal with a central apex, an anterior  
669 portion that slopes ventrally and that is nearly straight, and a posterior portion that is slightly  
670 concave (Figure 8A, C), similar to that of *Sauropelta* (Vickaryous et al., 2004) and *Stegosaurus*  
671 (NHMUK PV R36730; Maidment et al., 2015). In contrast, the dorsal margin of the axial neural  
672 spine is convex in *Lesothosaurus* (NHMUK PV R11004; Baron et al., 2017b) and straight in  
673 *Scelidosaurus* (NHMUK PV R1111; Norman, 2020b) and *Scutellosaurus* (Breedon et al.,



674 2021). Both the anterior and posterior ends of the neural spine overhang the articular surfaces  
675 slightly in lateral view, as seen also in *Lesothosaurus* (NHMUK PV R11004; Baron et al.,  
676 2017b) and some ankylosaurs (Vickaryous et al., 2004). By contrast, in *Scelidosaurus* the  
677 posterior end of the neural spine extends much farther than the posterior articular surface  
678 (NHMUK PV R1111; Norman, 2020b). Posteriorly, a deep, oval postspinal fossa is present, as  
679 also occurs in *Scelidosaurus* and *Stegosaurus* (NHMUK PV R1111, NHMUK PV R36730;  
680 Maidment et al., 2015; Norman, 2020b).

681 The third cervical vertebra is similar in size to the axis. The centrum is spool-shaped and  
682 constricted in the middle (Figure 8D). Its ventral surface possesses a rounded ridge that extends  
683 anteroposteriorly, contrasting with the presence of a keel in *Scelidosaurus* (Norman, 2020b)  
684 and *Scutellosaurus* (Breedon and Rowe, 2020; Breedon et al., 2021). In lateral view, the  
685 centrum is relatively short and sub-quadrate in outline (Figure 8A, C), with a length to posterior  
686 height ratio of approximately 1.4, similar to the condition in some ankylosaurs (Maleev, 1956;  
687 Kilbourne and Carpenter, 2005), but contrasting with the more elongate cervicals present in  
688 *Scelidosaurus* (~1.7; Norman, 2020b), *Scutellosaurus* (~2.1; Breedon and Rowe, 2020) and  
689 some stegosaurs (NHMUK PV R36730; Maidment et al., 2015). The parapophysis is not as  
690 prominent as that on the axis, and is a rounded process occupying the anterior corner of the  
691 lateral surface, posterior to which the lateral surface of the centrum is depressed. The right  
692 diapophysis curves ventrolaterally and its distal end is crescentic with a flat dorsal surface and  
693 a convex ventral margin, as in *Scelidosaurus* (Norman, 2020b). The prezygapophyses extend  
694 anterodorsally beyond the central anterior margin. The postzygapophyses project  
695 posterodorsally and somewhat laterally, terminating flush with the posterior margin of the  
696 centrum, and their articular facets face ventrolaterally. The dorsal surface of the  
697 postzygapophysis bears a rugose ridge that expands transversely as it extends posteriorly, as  
698 also occurs in *Scelidosaurus* (Norman, 2020b). The neural spine is damaged, but it appears to  
699 have expanded strongly posteriorly to overhang the posterior margin of the centrum (Figure  
700 8A–C). This feature is absent in *Scelidosaurus* (Norman, 2020b), in which the neural spine  
701 terminates more anteriorly, but is present in some cervicals of *Scutellosaurus* (Breedon and  
702 Rowe, 2020). A postspinal fossa is present but is smaller than that of the axis.

703 The fourth cervical centrum is similar to that of the preceding vertebra, both in overall  
704 morphology and proportions (Figure 8A–D). The lateral surface posterior to the parapophysis  
705 bears the shallowest excavation of the four preserved cervicals. The posterior articular surface  
706 has a crescentic outline, with a flat upper margin and ventral convex margin, and its centre is  
707 occupied by a semilunate concavity (Figure 8E). The parapophysis is cylindrical in outline,  
708 differing from those of the axis and third cervical, which have sub-triangular and rounded  
709 outlines, respectively. The transverse process extends ventrolaterally and has an elliptical  
710 cross-section (Figure 8A–D). The prezygapophysis projects anterodorsally to a point almost  
711 halfway along the preceding cervical centrum (Figure 8A), contrasting with the shorter  
712 processes present in *Scelidosaurus* (Norman, 2020b), *Scutellosaurus* (Breedon and Rowe,  
713 2020; Breedon et al., 2021) and *Stegosaurus* (Maidment et al., 2015), but it is unclear if this  
714 has been altered taphonomically. A postspinal fossa is present, but is the smallest found in the  
715 preserved cervicals. The large neural canal is rounded in outline (Figure 8E).

716 A cervical rib articulates with the parapophysis of the right axis and, partly, with the  
717 posterior surface of the atlas via its expanded single head. Its elongate shaft extends  
718 posterodorsally at an angle of 32° from the horizontal with a gentle curvature (Figure 8C),  
719 almost reaching the middle of the third cervical with a total length of about 75 mm. By contrast,  
720 the axial ribs of *Scelidosaurus* are relatively shorter (Norman, 2020b), but they are unknown  
721 in other early thyreophoran taxa. In *Yuxisaurus*, the rib shaft is transversely compressed and  
722 tapers distally, but that of *Scelidosaurus* is more rod-like (Norman, 2020b) but this difference  
723 could reflect taphonomic compression. The lateral surface of the rib shaft is generally flat, but

724 is slightly depressed anteriorly, and is separated from the head by a shallow break-in-slope in  
725 lateral view. By contrast, the axial rib of *Scelidosaurus* bears a lateral ridge along the shaft  
726 (Norman, 2020b). Another 26 mm-long rib fragment is attached to the lateroventral surface of  
727 the axis.

728

## 729 Dorsal vertebrae

730 Five isolated dorsal vertebrae of varying preservation are present (Figure 9) and are labelled  
731 as D1–5 for convenience. They are generally similar to those of a range of thyreophoran taxa,  
732 including *Scelidosaurus* and ankylosaurs (Vickaryous et al., 2004; Norman, 2020b), though  
733 they lack the extreme neural arch elongation of stegosaurs (Galton and Upchurch, 2004).

734 ‘D1’ preserves the centrum and the bases of the neural arch pedicles only (Figure 9A–E).  
735 Its anterior articular surface is concave (Figure 9C) while the posterior articular surface is flat  
736 but possesses a rounded fossa in the centre (Figure 9D). Both articular surfaces are subcircular  
737 in outline. The centrum has a subquadrate outline in lateral view (Figure 9A), is spool-shaped  
738 in ventral view and lacks a ventral keel (Figure 9E).

739 The centrum of ‘D2’ is spool-shaped with a ventral margin that is gently arched in lateral  
740 view (Figure 9F–J). The ventral surface is rounded and lacks a keel (Figure 9J). Both articular  
741 surfaces are subcircular in outline but with a slightly flattened dorsal margin (Figure 9H, I).  
742 The anterior articular surface appears to be more dorsoventrally compressed than the posterior  
743 one. The anterior articular surface is concave, while the posterior surface is nearly flat with its  
744 centre occupied by a distinct concavity. A partial neural arch is present. The parapophysis is  
745 positioned level with the dorsal part of the neural canal and is an expanded oval facet that is  
746 situated close to the anterior rim of the centrum in lateral view (Figure 9F). Its diapophysis is  
747 stout and projects laterodorsally at an angle of  $\sim 33^\circ$  above the horizontal. Its dorsal surface is  
748 generally flat with a gentle swelling in the middle. Although broken, the neural spine appears  
749 to have been low, with a transverse expansion anteriorly, and is nearly level with the  
750 diapophysis in height in lateral view (Figure 9F). The neural canal is ovoid in outline and  
751 dorsoventrally elongated (Figure 9H, I). All of the zygapophyses are missing, but a broad  
752 infrapostzygapophyseal fossa is present (Figure 9F).

753 ‘D3’ has an amphicoelous, spool-shaped centrum (Figure 9K–O). In lateral view its ventral  
754 margin is more arched than that of ‘D2’ (Figure 9K), and its ventral surface is constricted into  
755 a keel (Figure 9O). The left lateral surface bears an anteroposteriorly elongated depression on  
756 its dorsal part, but this is absent on the right-hand side. A partial neural arch is present. The  
757 remaining portion of the left diapophysis is horizontally inclined and has a flat dorsal surface.  
758 The neural spine is thickened mediolaterally, with a transverse width of 16 mm in the middle,  
759 which is significantly greater than that of ‘D2’ (4 mm). The thickened neural spine and  
760 horizontal transverse process suggest that this is most likely a posterior dorsal vertebra  
761 (Norman, 2020b). The prezygapophysis curves anterodorsally from the base of the neural  
762 spine, overhanging the anterior margin of the centrum (Figure 9K). Its articular facet was  
763 probably directed dorsally but is concealed by an adhered fragment of the preceding  
764 postzygapophysis. In anterior view, the infraprezygapophyseal surface is broadly concave  
765 (Figure 9M). The postzygapophyseal fragment of the preceding vertebra is massive, extending  
766 across the vertebral midline, suggesting that the postzygapophysis fused with its counterpart in  
767 the posterior dorsal series.

768 ‘D4’ consists of a centrum and partial neural arch lacking processes (Figure 9P–T). The  
769 centrum is slightly longer than that of ‘D3’ (Table 1), but its morphology is generally similar,  
770 including the presence of a ventral keel (Figure 9T). Its right lateral surface bears a shallow,  
771 elongate depression, but this is absent on the left. The remnant of the left parapophysis indicates  
772 that it was positioned high on the neural arch, immediately above the neural canal. Viewed

773 anteriorly both of the neural arch pedicles are stout and have the lateral margins that curve  
774 dorsally and then laterally as also occurs in ‘D2’ and ‘D3’ (Figure 9R).

775 ‘D5’ consists only of the centrum and the broken bases of the neural arch pedicles (Figure  
776 9U–Y). It is generally similar to the other dorsal vertebrae and is of equal length to ‘D4’,  
777 although its concave lateral surfaces are smooth and lack depressions. The ventral margin of  
778 the centrum is only slightly concave in lateral view, and in ventral view the keel is less  
779 prominent than that of ‘D4’ (Figure 9Y). The presence of ventral keels in posterior dorsal  
780 vertebrae contrasts with their absence in *Scelidosaurus* (Norman, 2020b) and *Stegosaurus*  
781 (Maidment et al., 2015), although some ankylosaurs have keeled posterior dorsal centra  
782 (Kirkland and Carpenter, 1994; Kirkland et al., 2013).

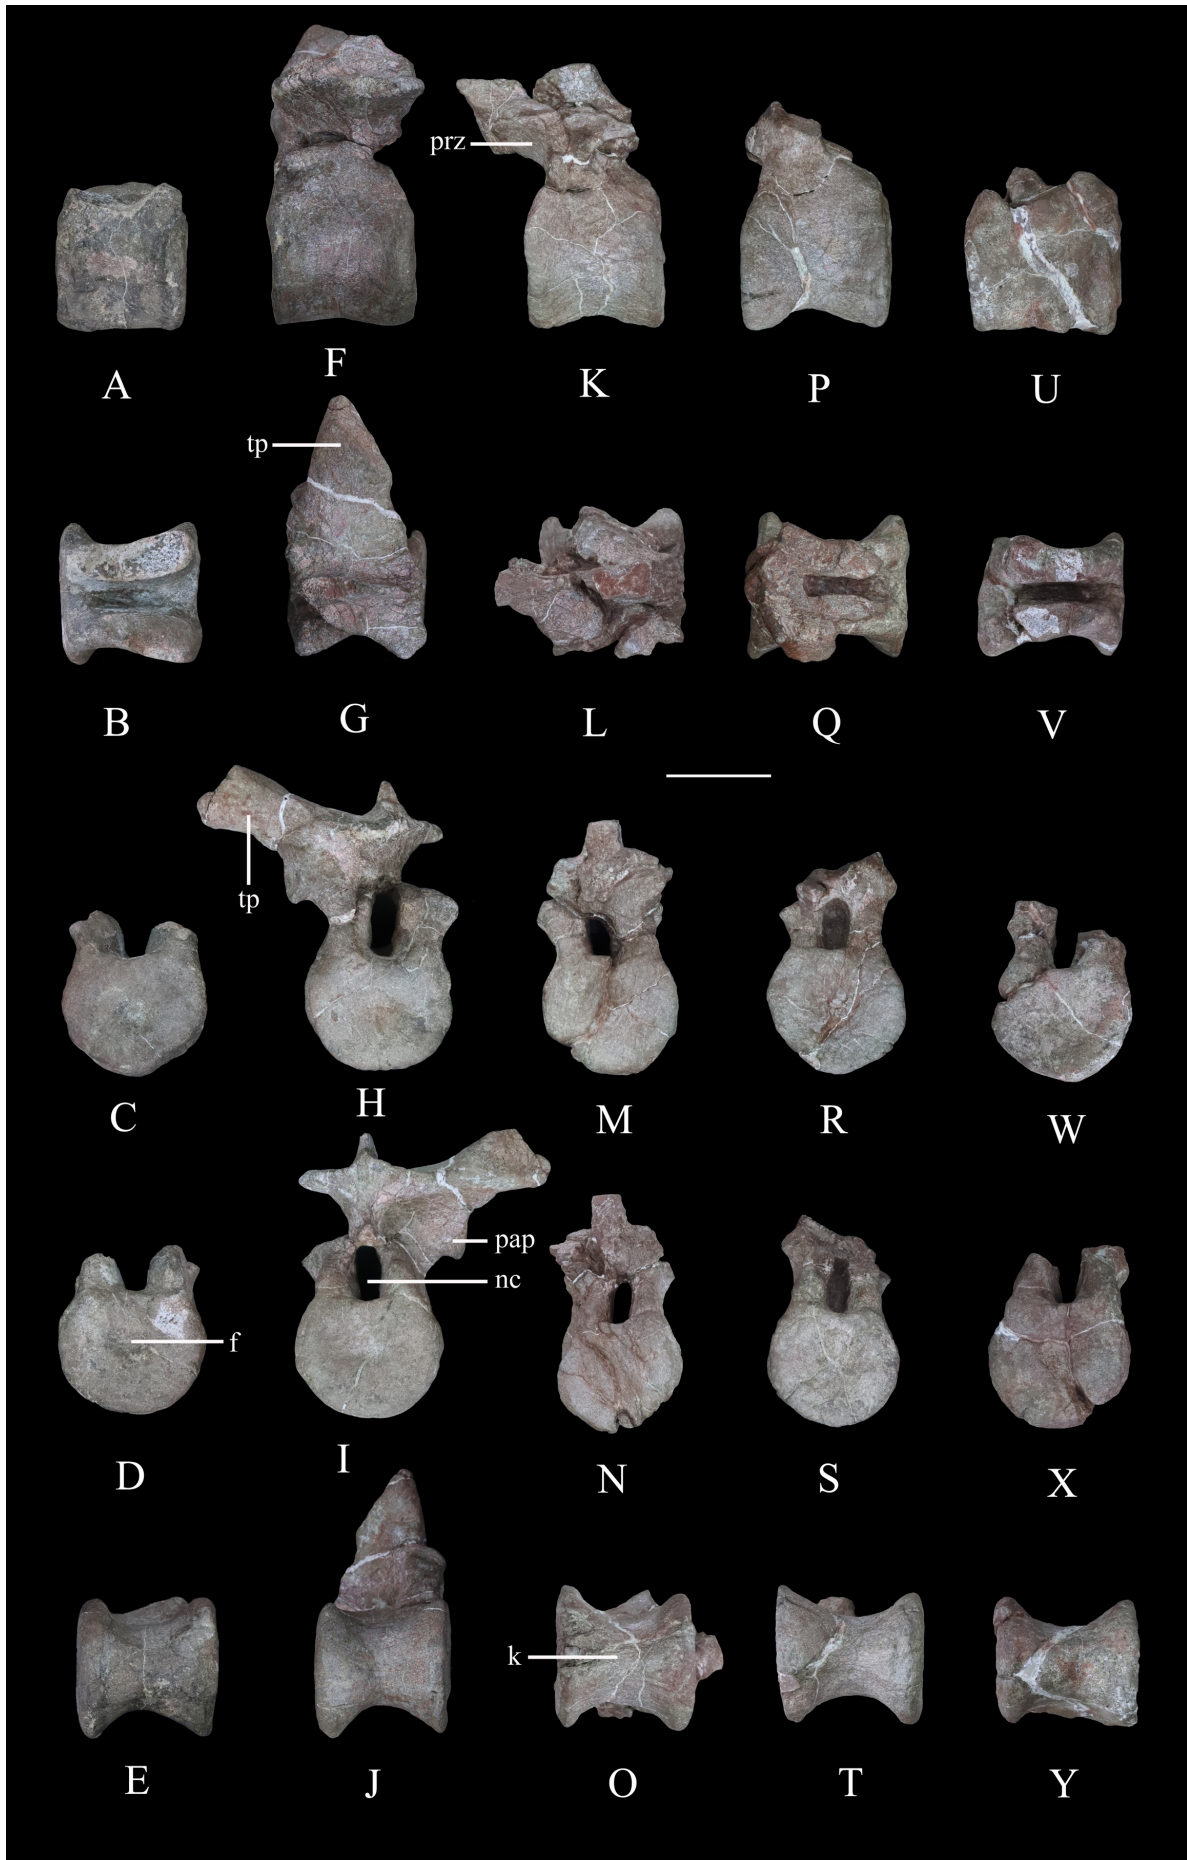



784 **Figure 9.** Dorsal vertebrae of *Yuxisaurus kopchicki*. D1 in (A) left lateral, (B) dorsal, (C) anterior, (D) posterior  
785 and (E) ventral views. D2 in (F) left lateral, (G) dorsal, (H) anterior, (I) posterior and (J) ventral views. D3 in (K)  
786 left lateral, (L) dorsal, (M) anterior, (N) posterior and (O) ventral views. D4 in (P) left lateral, (Q) dorsal, (R)  
787 anterior, (S) posterior, and (T) ventral views. D5 in (U) left lateral, (V) dorsal, (W) anterior, (X) posterior and (Y)  
788 ventral views. Abbreviations: f, fossa; k, keel; nc, neural canal; pap, parapophysis; prz, prezygapophysis; tp,  
789 transverse process. Scale bar equals 5 cm.

790

## 791 **Appendicular skeleton**

792 The specimen includes limited appendicular elements, including: the proximal part of a left  
793 scapula and the distal part of the right scapula (Figure 10); a complete right humerus (Figure  
794 11); and the distal part of the left femur (Figure 12).

795

## 796 **Scapula**

797 The scapula is represented by a right scapula blade (Figure 10A–D) and a left proximal  
798 plate (Figure 10E–H), but unfortunately these two pieces do not overlap in morphology so the  
799 overall shape and size of the scapula remains unclear. However, on the basis of the preserved  
800 parts, we estimate that a complete scapula would have been at least 475 mm long.

801 The left proximal plate of the scapula is poorly preserved with broken margins (Figure  
802 10E–H). As preserved, it has a maximum width of ~188 mm. It is expanded dorsoventrally  
803 with respect to the scapula shaft and its lateral surface is shallowly convex. Anteriorly, a portion  
804 of the glenoid fossa is present, which is anteroposteriorly concave. An anteroposteriorly  
805 elongated depression occupies the ventral surface immediately posterior to the glenoid on the  
806 medial surface of the proximal end, as also occurs in *Gastonia* (Kinneer et al., 2016). The  
807 medial surface of the proximal scapula is strongly convex (Figure 10F). Few other details are  
808 available due to damage.

809 The scapula blade is relatively thick transversely, with a convex lateral surface and a flat  
810 or slightly depressed medial surface. In lateral view, its distal end is expanded dorsoventrally,  
811 with a maximum distal width of ~138 mm and a mid-shaft width of ~83 mm (Figure 10A–D).  
812 The dorsal and ventral margins of the scapula blade are subparallel along most of its length in  
813 lateral view, but the dorsal margin diverges slightly to contribute to the distal expansion, while  
814 the ventral margin curves ventrally at its distal end, so that the distal expansion is slightly  
815 asymmetrical with respect to the scapula long-axis. The distal margin is gently convex. This  
816 produces a scapula blade outline similar to those of *Scutellosaurus* (Breedon & Rowe, 2020),  
817 *Scelidosaurus* (Norman, 2020b) and some stegosaurs (Galton and Upchurch, 2004), while in  
818 most ankylosaurs, such as *Gargoyleosaurus*, *Sauropelta* and *Gastonia*, the dorsal scapular  
819 margin almost parallels the ventral margin and curves posteroventrally (Godefroit et al., 1999;  
820 Brandon and Carpenter, 2005; Kinneer et al., 2016; Vickaryous et al., 2004), and in  
821 *Stegosaurus* these margins are essentially subparallel along their entire lengths (Maidment et  
822 al., 2015). Close to the distal end, the lateral surface bears a broad depression, but it is not  
823 clear if this is an original feature or due to taphonomic damage as there is some cracking in  
824 the area (Figure 10A). In dorsal or ventral views, the scapula blade is bowed, with the distal  
825 end inclined medially (Figure 10C, D).



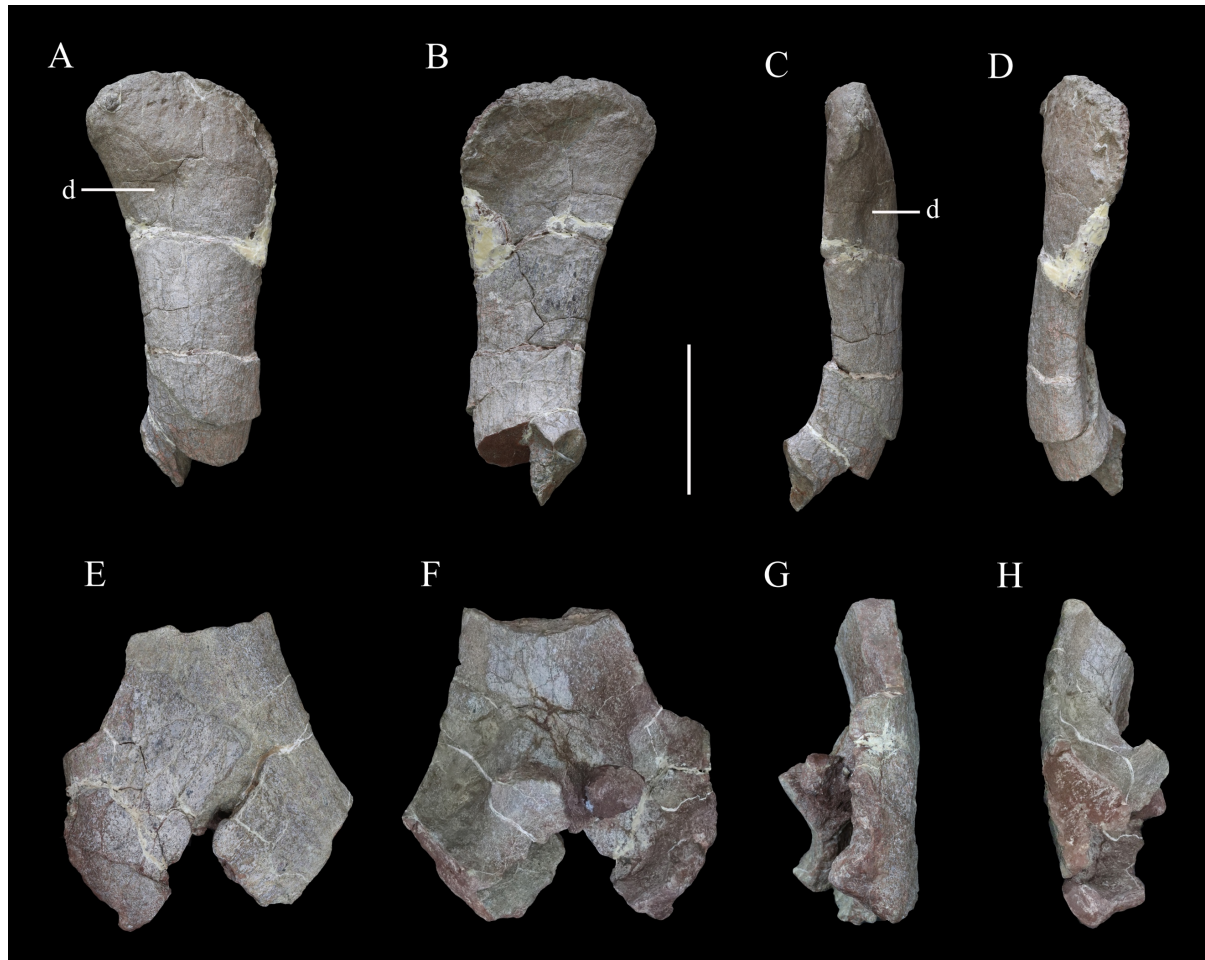

826  
827  
828  
829  
830

**Figure 10.** Scapulae of *Yuxisaurus kopchicki*. Distal part of right scapula in (A) lateral, (B) medial, (C) ventral and (D) dorsal views. Proximal part of left scapula in (E) lateral, (F) medial, (G) ventral and (H) dorsal views. Abbreviation: d, depression. Scale bar equals 10 cm.

### 831 Humerus

832 The right humerus is well preserved, except for a small section of the distal end (Figure  
833 11). It has an elongate, slender shaft, with a diameter of ~50 mm, which separates the proximal  
834 and distal expansions, which reach maximum widths of ~160 mm and 120 mm, respectively  
835 (Figure 11A, C). Both of these expansions are relatively broader than in either *Scutellosaurus*  
836 (Colbert, 1981; Breeden and Rowe, 2020; Breeden et al., 2021) or *Scelidosaurus* (Norman,  
837 2020b), giving the humerus of *Yuxisaurus* a stockier appearance that is much more similar to  
838 those of ankylosaurs and stegosaurs (Galton and Upchurch, 2004; Vickaryous et al., 2004).

839 In anterior view, the humerus is straight, with the shaft lacking any significant deflection,  
840 and has a total length of ~345 mm (Figure 11A). A robust deltopectoral crest arises from the  
841 lateral margin of the proximal expansion and curves anteriorly and slightly medially,  
842 terminating in a thickened, transversely expanded distal end (35 mm in thickness). The  
843 deltopectoral crest extends to a point ~46% of humeral length (Figure 11A). This is similar to  
844 the conditions present in *Scelidosaurus* (Norman, 2020b) and some ankylosaurs (e.g.,  
845 *Pawpawsaurus*, *Europelta*: Lee, 1996; Kirkland et al., 2013), but differs from those of other  
846 ankylosaurs (e.g., *Pinacosaurus*, *Saichania*), where this crest terminates more distally  
847 (Maryanska, 1977; Godefroit et al., 1999), and *Scutellosaurus*, where it ends more proximally  
848 (Breeden et al., 2021). The proximal anterior surface is strongly concave. In anterior view, the  
849 internal tuberosity has a straight, steeply inclined dorsomedial margin, which meets its curved  
850 ventromedial margin at an angle of ~110°. In proximal view, the internal tuberosity is

851 anteroposteriorly expanded and is separated from the humeral head by a distinct notch dorsally  
852 (Figure 11E). This notch is absent in *Scelidosaurus* (Norman, 2020b) and *Scutellosaurus*  
853 (Breedon and Rowe, 2020; Breedon et al., 2021) but is present in some ankylosaurians  
854 (Vickaryous et al., 2004). The humeral head is subspherical, protrudes posteriorly and  
855 somewhat anteriorly with respect to the rest of the proximal end, and its posterior end curves  
856 posterolaterally, forming a triangular process (Figure 11E). This process partially encloses a  
857 posterolateral concavity, which is present in *Scelidosaurus* (Norman, 2020b) and *Europelta*  
858 (Kirkland et al., 2013) but not *Stegosaurus* (Maidment et al., 2015) or *Scutellosaurus* (Breedon  
859 et al., 2021). In posterior view, the proximal surface is convex, and a broad swelling arises  
860 from the base of the humeral head that extends ventrally for a short distance (Figure 11C). On  
861 the posterior surface of the deltopectoral crest there is a large triceps tubercle, which is  
862 obliquely oriented and has a sharp, pointed apex (Figure 11B). This tubercle is present in  
863 various ankylosaurs, such as *Gastonia* and *Gargoyleosaurus*, and is supposedly homologous  
864 with a pocket-like muscle scar present in *Scelidosaurus* (Brandon and Carpenter 2005;  
865 Norman, 2020b), but is absent in *Lesothosaurus* (Baron et al., 2017b) and *Scutellosaurus*  
866 (Colbert, 1981; Breedon et al., 2021).

867 The shaft has a subtriangular cross-section in its midpart, with a flat anterior surface and  
868 convex posterior surface. Distally, the medial (ulnar) condyle extends further ventrally than the  
869 lateral condyle and also exhibits greater anteroposterior expansion. A broad, shallow, ‘U’-  
870 shaped fossa is positioned immediately dorsal to the distal condyles on the anterior surface  
871 (Figure 11A), which differs from the longer, narrower, ‘V’-shaped and shallower fossa seen in  
872 other early thyreophorans (Breedon and Rowe, 2020; Norman, 2020b; Breedon et al., 2021)  
873 and stegosaurs (Maidment et al., 2015), although a similar fossa occurs in some ankylosaurs  
874 (Vickaryous et al., 2004). A narrow, vertical depression separates the two condyles on the  
875 posterior surface (Figure 11C). In ventral view, the distal end has a dumbbell-shaped outline,  
876 though the ulnar condyle is more strongly expanded anteroposteriorly than the radial condyle  
877 (Figure 11F).

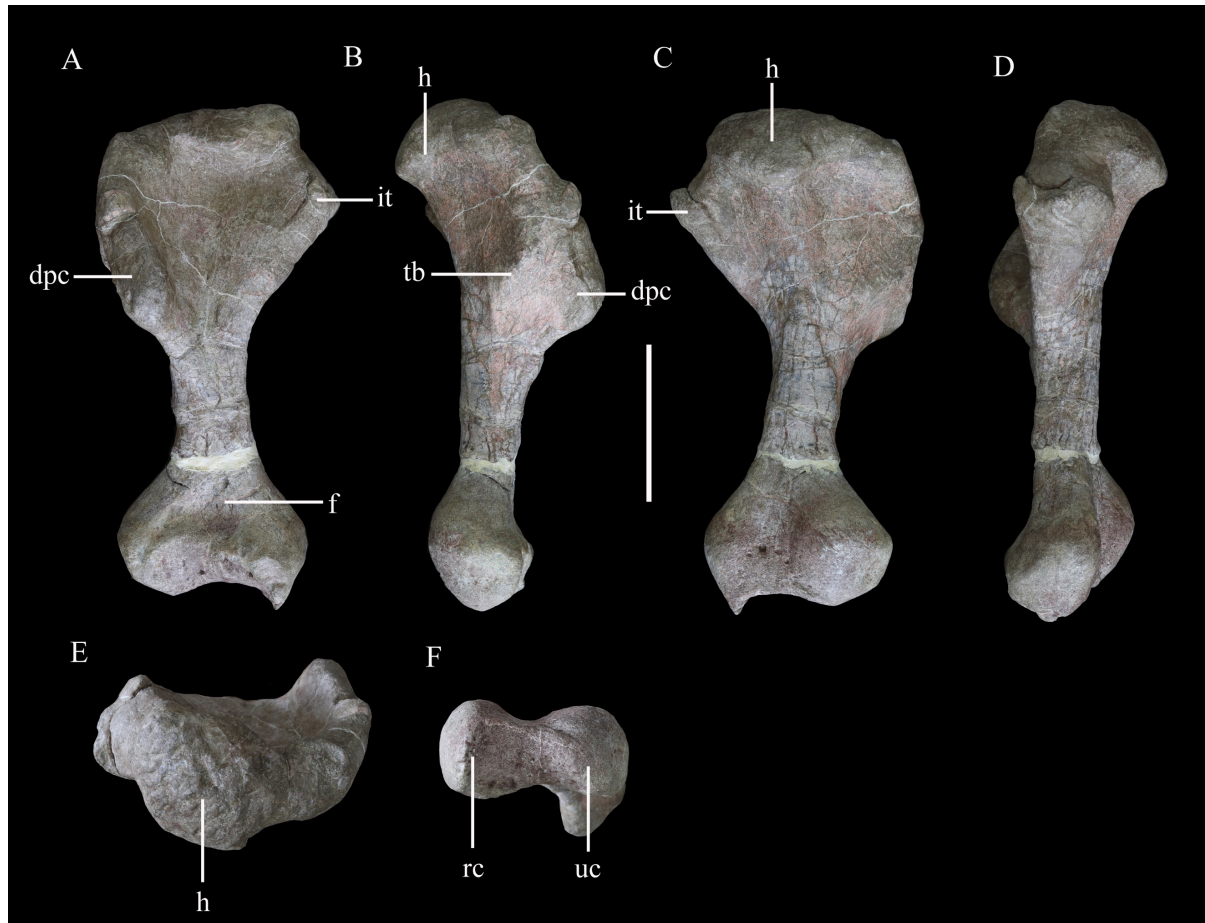

878  
879 **Figure 11.** Right humerus of *Yuxisaurus kopchicki* in (A) anterior, (B) lateral, (C) posterior, (D) medial, (E)  
880 proximal and (F) distal views. Abbreviations: dpc, deltopectoral crest; f, fossa; h, humeral head; it, internal  
881 tuberosity; rc, radial condyle; tb, tubercle; uc, ulna condyle. Scale bar equals 10 cm.

882

### 883 Femur

884 The distal end of the left femur is preserved (Figure 12). It reaches a maximum transverse  
885 width of ~151 mm and is ~110 mm in anteroposterior length. The distal end is mediolaterally  
886 and anteroposteriorly expanded with respect to the preserved part of the femoral shaft (Figure  
887 12A). The shaft has a subrectangular cross-section (Figure 12E). The anterior surface of the  
888 distal femur is generally flat, but its medial part is damaged. The distal end is divided into two  
889 articular condyles (Figure 12B). In posterior view, the lateral condyle is ovoid, dorsoventrally  
890 compressed, and curves slightly posteroventrally from its base, while the medial condyle is  
891 broad, triangular, and protrudes slightly posterodorsally (Figure 12A). In ventral view, the  
892 condyles are separated by a broad, deep and ‘U’-shaped intercondylar groove (Figure 12B) that  
893 is confluent dorsally with a deep narrow sulcus that extends for a short distance on the posterior  
894 surface (Figure 12A). In ventral view, the lateral and medial condyles extend for approximately  
895 the same distance anteriorly and enclose a shallow anterior trough (Figure 12B). The lateral  
896 condyle has a mediolaterally narrow, subrectangular outline in distal view, and is inset from  
897 the lateral margin so that it is separated from it by a distinct notch (Figure 12B, C)). The lateral  
898 condyle also projects slightly further posteriorly than the mediolaterally wider, rounded medial  
899 condyle. The border of the medial condyle is invaginated to form a broad, ‘U’-shaped trough  
900 (Figure 12B), that is confluent with a shallow depression on the medial surface of the distal  
901 femur (Figure 12D). This trough/depression is absent in *Scelidosaurus* (Norman, 2020b),  
902 *Scutellosaurus* (Colbert, 1981; Breeden et al., 2021), ankylosaurs (e.g., Kilbourne and  
903 Carpenter, 2005; Kirkland et al., 2013; Kinner et al., 2016) and stegosaurs (Gilmore, 1914)



904 and is considered a potential autapomorphy of *Yuxisaurus*. A roughened swelling on the lateral  
905 lateral surface just dorsal to the notch bounding the lateral condyle might represent the attachment of  
906 the *M. gastrocnemius*.  
907

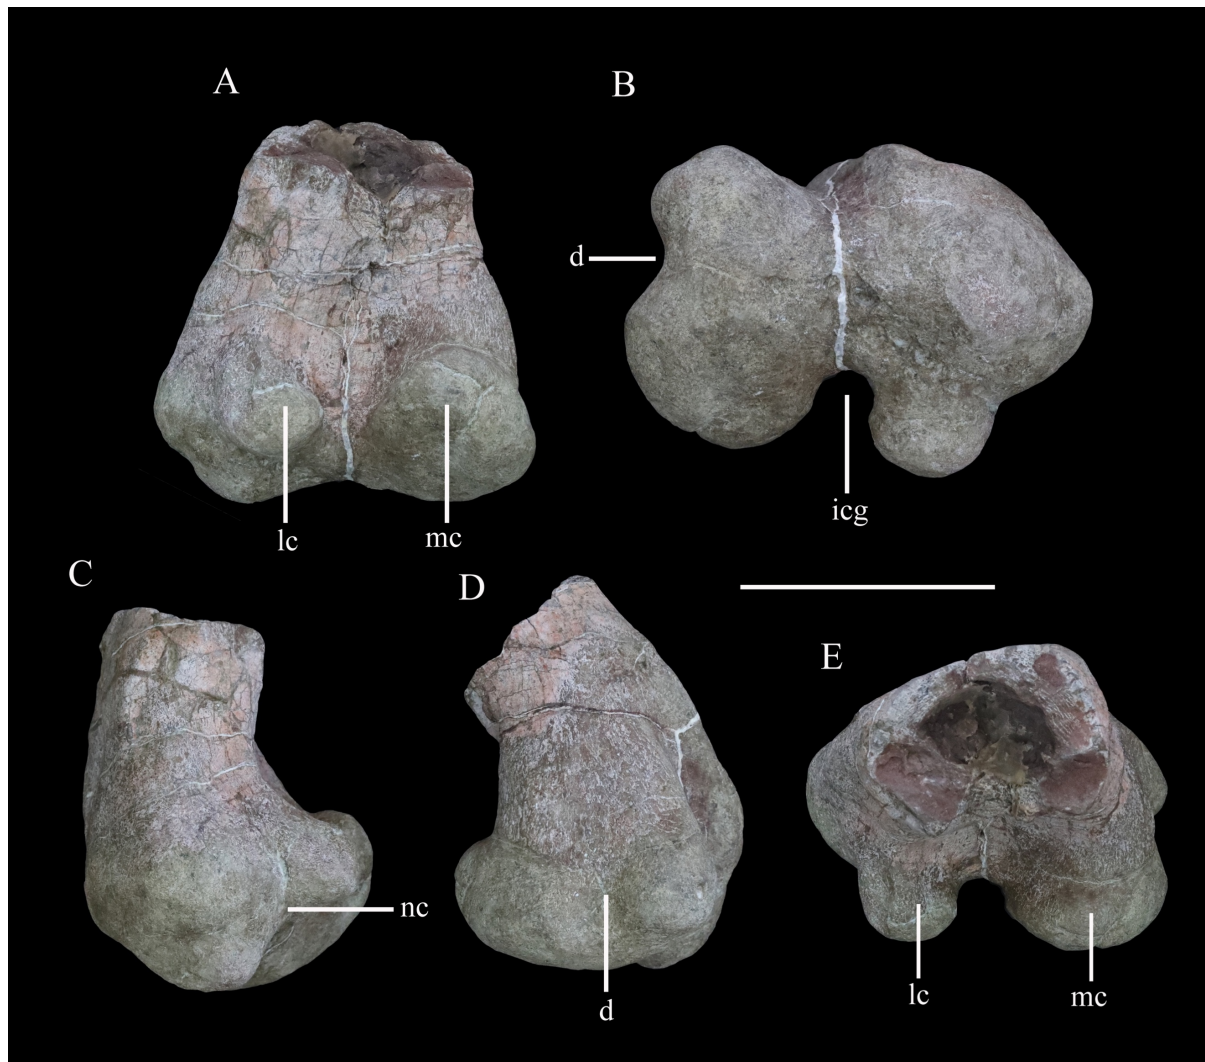

908  
909  
910 **Figure 12.** Distal end of right femur of *Yuxisaurus kopchicki* in (A) posterior, (B) ventral, (C) lateral, (D) medial  
911 and (E) dorsal views. Abbreviations: d, depression; icg, intercondylar groove; lc, lateral condyle; mc, medial  
912 condyle; nc, notch. Scale bar equals 10 cm.

### 913 **Osteoderms**

914 More than 120 osteoderms of *Yuxisaurus kopchicki* were recovered (Figures 13–15).  
915 However, all of these were found disassociated, without direct evidence of their original life  
916 positions. Nevertheless, co-ossified osteoderms are usually present in the cervical or pectoral  
917 regions of thyreophorans whereas single osteoderms are distributed among other body parts  
918 (e.g., Blows, 2001; Vickaryous et al., 2004), allowing some tentative conclusions on their  
919 positions to be made.

920

#### 921 **Cervical and pectoral osteoderms**

922 Seven compound osteoderms are preserved. Two of these consist of three elements  
923 (‘tripartite osteoderms’) and the remaining five consist of two elements (‘bipartite osteoderms’)  
924 (Figure 13). In all of these compound structures the individual osteoderms are fused



925 indistinguishably and it is likely that other co-ossified osteoderms were originally attached to  
926 some of these structures but were not preserved.

927 The two tripartite osteoderms (referred to hereafter as TPO 1 and 2) are similar in size and  
928 shape and mirror each other anatomically (Figure 13A–F). Each is composed of a blade-like  
929 lateral spine, a stouter, intermediate spine and a conical medial osteoderm. In TPO 1 (Figure  
930 13A–C), which is interpreted as from the right-hand side of the body, the base of the lateral  
931 spine is anteroposteriorly wide (128 mm) but thins dorsoventrally (45 mm). This spine extends  
932 laterally and its anterior and posterior margins are sharp. The straight anterior margin is  
933 inclined posteriorly while its posterior margin is slightly convex. Although the apex is missing,  
934 it seems reasonable to assume that the two edges converged to a point apically. Its lateral  
935 surface is swollen laterally in its central part. Four parallel ridges and the grooves between  
936 them extend on to the lateral surface from the base: however, these features are absent in TPO  
937 2, which suggests that they might be due to accidental over-preparation. The intermediate spine  
938 of TPO 1 is directed dorsoventrally. It has a suboval base, which is anteroposteriorly elongated  
939 (108 mm) but transversely narrow (78 mm), and that is tall dorsoventrally (107 mm). In TPO  
940 1 the anterior margin of the intermediate spine is long and convex, but in TPO 2 (inferred to  
941 be from the right-hand side; Figure 13D–F) this margin is divided into two straight edges. In  
942 both specimens, the posterior margins of these spines are deflected, and are consistently shorter  
943 than the anterior margins: as a result, the dorsal apex is posteriorly displaced relative to the  
944 base. Their lateral surfaces are concave and smooth, lacking foramina or grooves, and bear a  
945 central swelling, which is vertically directed, on either side. In both TPO 1 and 2 the medial-  
946 most osteoderm is the smallest of the three (Figure 13A, C, D, F). It is similar to the others,  
947 and in TPO 1 has an anteroposteriorly elongated (62 mm) but transversely narrow (40 mm)  
948 base. Nevertheless, the spine is more conical in shape with a smooth rounded lateral surface. It  
949 has a posteriorly displaced dorsal apex, which is almost flush with the posterior margin of the  
950 base. Its dorsal end bears a small protrusion.

951 In anterior or posterior views, the conjoined ventral surface of each tripartite structure is  
952 arched (Figure 13A, C, D, F), presumably corresponding to the neck shape of *Yuxisaurus*. Co-  
953 ossified cervical half-rings are present only in *Scelidosaurus* and ankylosaurians among  
954 Thyreophora (e.g., Carpenter, 2001; Norman, 2021), and vary in terms of the number of  
955 osteoderms included and their individual morphology (e.g., Blows, 2001). The partial cervical  
956 half-rings of *Yuxisaurus* are not fused to any other half-rings and closely resemble the third  
957 cervical half-ring of *Scelidosaurus*, as well as those of *Gargoyleosaurus*, *Sauropelta*,  
958 *Silvisaurus*, *Gastonia*, *Stegopelta* and *Ankylosaurus* (Carpenter, 1984; Ford, 2000; Brandon  
959 and Carpenter, 2005; Kinner et al., 2016, Norman, 2020c). The external surfaces of the  
960 cervical osteoderms are generally smooth, similar to those of the ankylosaurians *Gastonia* and  
961 *Silvisaurus* (Eaton, 1960; Kinner et al., 2016), whereas they are pitted or vascularized in the  
962 early-branching thyreophorans *Scutellosaurus* and *Scelidosaurus*, and in most ankylosaurians,  
963 such as *Mymoorapelta*, *Edmontonia*, *Europelta*, *Saichania* and *Pinacosaurus* (Maryanska,  
964 1977; Kirkland and Carpenter, 1994; Kirkland et al., 2013; Burns and Currie, 2014; Breeden  
965 and Rowe, 2020; Norman, 2020c; Breeden et al., 2021).

966 The first bipartite osteoderm (termed ‘BPO 1’ hereafter) is composed of two spines (Figure  
967 13G–I). These are similar in morphology, with an elongated oval base, a blade-like body and  
968 a convex dorsal end (Figure 13G). BPO 1 is inferred to be from the left side of the body when  
969 the spine apices are posteriorly placed relative to their base. The lateral spine curves  
970 dorsolaterally with a concave medial surface and convex lateral surface; the medial spine is  
971 straight with the lateral and medial surfaces nearly symmetrical to each other. The spine  
972 margins are somewhat convex, except that the posterior edge of the medial spine is straight. In  
973 posterior view, the lateral spine diverges from the medial spine at an angle of 45°. In dorsal  
974 view (Figure 13H), the lateral spine is more posteriorly placed than the lateral spine, and the

975 junction slightly narrows anteroposteriorly, leaving a broad concavity anteriorly and a narrow  
976 one posteriorly. Consequently, the lateral spine appears to contact the posterolateral portion of  
977 the medial spine. The ventral surface of the medial spine bears a curved ventromedial  
978 expansion, rendering its ventral surface concave. This expansion also extends anteriorly for a  
979 short distance.

980 The second bipartite osteoderm, BPO 2, has a similar configuration but is from the right-  
981 hand side of the body (Figure 13J–L). Compared to BPO 1, the medial spine is more robust  
982 (Figure 13J). This spine has a wide base and its distal end curves somewhat medially. The  
983 lateral spine diverges from the medial spine at an angle of 70° when the medial spine is  
984 vertically positioned. The surfaces of BPO 2 are not as smooth as those of BPO 1: grooves are  
985 present on the lateral surface of the lateral spine; the medial spine is medially pitted at the base;  
986 and the conjoined ventral surface is ornamented with striations. The junction between the  
987 individual osteoderms has suffered severe damage, leaving a large fissure.

988 A pair of symmetrical bipartite osteoderms, BPO 3 (Figure 13M–O) and BPO 4 (Figure  
989 13P–R), are similar in size and appearance. Each is composed of two spines of distinct sizes.  
990 In both specimens, the larger spine is oval-based, has a nearly flat medial surface and a  
991 dorsoventrally concave but anteroposteriorly convex lateral surface. Both its anterior and  
992 posterior edges are curved and converge dorsally into a pointed apex. By contrast, the smaller  
993 spine has straight anterior and concave posterior margins that are both sharp, which terminating  
994 dorsally in a rounded apex. Its lateral surface is flat and the medial surface is convex. In dorsal  
995 view, the junction between the two osteoderms has a broad anterior concavity but an obtuse  
996 angle posteriorly, and unlike the condition in BPO 1, the lateral spine contacts the anterolateral  
997 corner of the medial spine. The co-ossified ventral surface is smooth and concave.

998 The fifth bipartite osteoderm (BPO 5) consists of a spine and a plate (Figure 13S–U). The  
999 spine has a long sharp edge, which extends obliquely and dorsally from the base, opposite to  
1000 which is a short, blunt, vertical margin. Its lateral surfaces are strongly convex. The plate is  
1001 generally flat dorsally, but half of it curves ventrally to meet, and project slightly beyond, the  
1002 ventral margin of the spine. A gradual widening trough, which parallels part of the lateral  
1003 surface, crosses the plate's dorsal surface and extends ventrally next to the spine along the  
1004 curved half surface. The plate contacts the spine at the front of the short edge. The conjoined  
1005 ventral surface is severely damaged.

1006 Asymmetrical co-ossified bipartite osteoderms are uncommon and present only among the  
1007 cervical armour of *Scelidosaurus*, the lateral pectoral armour of *Edmontonia* and in a possible  
1008 Early Jurassic ankylosaur from India (Ford, 2000; Galton, 2019; Norman, 2020c). Therefore,  
1009 these bipartite osteoderms were most likely from the cervical or pectoral region.

1010 It seems likely that two isolated blade-like spines are also from the cervical region. These  
1011 spines have an elongated oval base, so that the body and base are both narrow (Figure 13V,  
1012 W). They both have a long convex edge and a short concave edge, so that the dorsal apex  
1013 projects beyond the level of the base. The ventral half of the convex edge is nearly straight,  
1014 then curves posterodorsally and continues dorsally with a mild curvature. The dorsal end is  
1015 sharp on one spine but rounded on the other slightly larger one. Each spine has a depressed  
1016 medial surface and a slightly convex lateral surface, although the larger spine (Figure 13V)  
1017 bears a vertical depression on the convex surface close to its longest margin. The ventral  
1018 surface is depressed but also bears an anteroventral expansion as in BPO 1 and BPO 2. These  
1019 two spines are similar in appearance to the cervical spines of *Polacanthus* and the caudal plates  
1020 of *Mymoorapelta* (Kirkland and Carpenter, 1994; Blows and Honeysett, 2014). However, the  
1021 caudal plates are hollowed ventrally in *Mymoorapelta*; consequently, these spines are most  
1022 likely from the cervical region of *Yuxisaurus*.

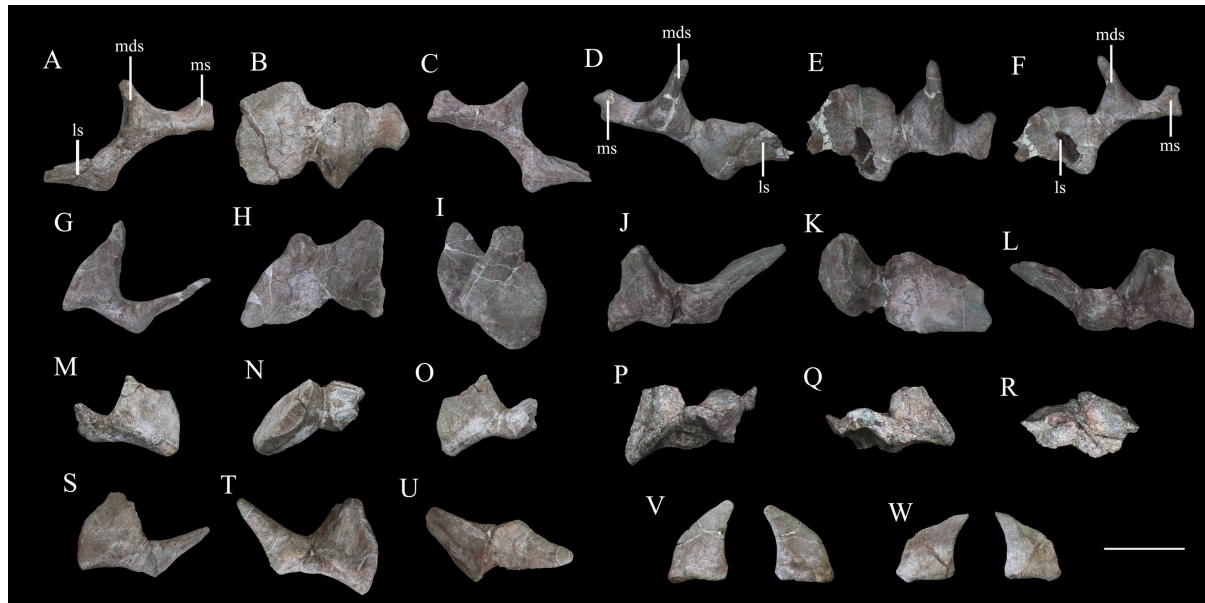

1023  
1024  
1025  
1026  
1027  
1028  
1029  
1030

**Figure 13.** Cervical and pectoral osteoderms of *Yuxisaurus kopchicki*. Tripartite compound osteoderm (TPO) 1 in (A) anterior, (B) dorsal and (C) posterior views. TPO 2 in (D) anterior, (E) dorsal and (F) posterior views. Bipartite osteoderm (BPO) 1 in (G) anterior, (H) dorsal and (I) medial views; BPO 2 in (J) anterior, (K) dorsal, and (L) posterior views; BPO 3 in (M) anterior, (N) dorsal and (O) posterior views; BPO 4 in (P) anterior, (Q) posterior and (R) dorsal views; and BPO 5 in (S) anterior, (T) posterior and (U) dorsal views. Blade-like cervical spines in ?anterior and ?posterior views (V, W). Abbreviations: ls, lateral spine; mds, middle scute; ms, medial scute. Scale bar equals 10 cm.

1031

### 1032 Other osteoderms

1033

1034

1035

1036

1037

1038

1039

1040

1041

1042

1043

1044

1045

1046

1047

1048

1049

1050

1051

1052

1053

1054

1055

1056

1057

1058

Most other individual osteoderms are similar (Figure 14). They are oval-based, with a convex or slightly concave longest margin and a vertical or slightly concave short margin. These margins converge dorsally into an apex. Therefore, the body appears to be curved in osteoderms with a concave short margin, but straight in those with a vertical short margin. The longest margin is generally sharp whereas the shorter margin is rounded in some cases, although occasionally both margins are rounded. Ventrally they are generally flat but sometimes convex, with the ventral margins somewhat everted. The lateral surfaces are depressed, but generally bear a vertical swelling in their centres. It is noteworthy that 15 of the 120 osteoderms have a foramen or are excavated ventrally. Where present the foramina have rounded outlines and are usually small relative to the ventral surface area, but they appear to open out and expand into cavities within the osteoderm. By contrast, the ventral excavations are fully open, creating an osteoderm inner surface. Generally, the osteoderms with a solid ventral surface are smaller in size than those with a hollow base. The largest hollow-based osteoderm is damaged but was at least 160 mm long, 150 mm wide and 110 mm tall (Figure 14A–D). With reference to *Scelidosaurus*, the relatively large hollow-based osteoderms probably formed the primary rows across the dorsolateral body surface or the caudal region, while other smaller osteoderms would have been interspersed among them (Norman, 2020c).

A unique ‘pup tent’-shaped osteoderm is approximately 126 mm long and 94 mm tall but lacks anterior and posterior walls (Figure 15). It is triangular in cross-section and strongly excavated ventrally with a dorsal acute angle on one surface but rounded on the other side. Although weathered, the two buttresses are generally straight and divergent at an angle of  $\sim 48^\circ$ . The outline between the buttresses resembles the overline outline of the osteoderm in both anterior and posterior views, and the external and inner surfaces are smooth and slightly depressed (Figure 15). In dorsal view, the roof is somewhat curved and the rounded end transversely expands more than the acute side. Viewed laterally, the dorsal roof is nearly straight, overhanging the ventral end on both sides. This osteoderm appears to be similar to an

1059 anterior median caudal scute referred to *Scelidosaurus* from Arizona, USA (Padian, 1989), and  
1060 we propose that, in life, it was probably situated on the midline of the posterior part of the body  
1061 of *Yuxisaurus*. Alternatively, this unusual morphology might represent a pathology.  
1062

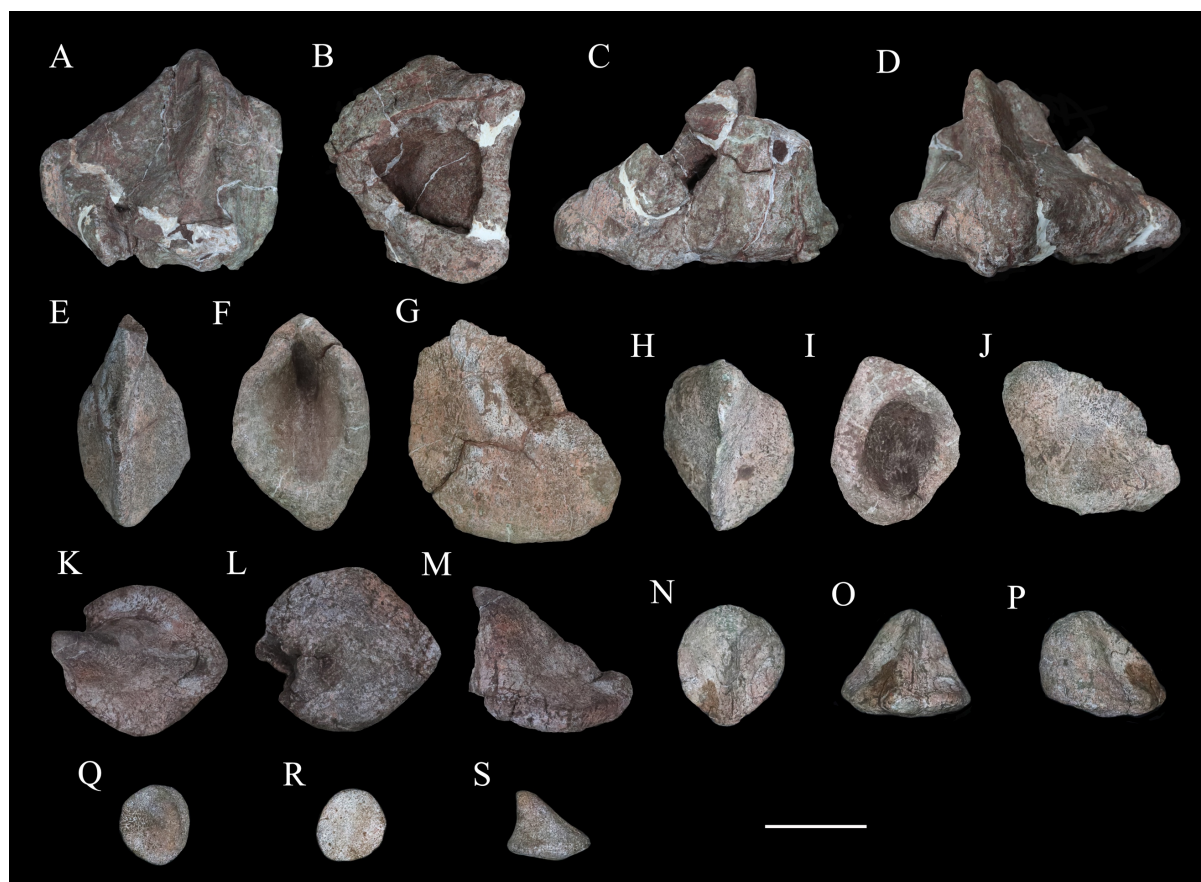

1063  
1064  
1065 **Figure 14.** Six selected individual osteoderms of *Yuxisaurus kopchicki*. Osteoderm 1 in (A) dorsal, (B) ventral,  
1066 (C) posterior and (D) anterior views; osteoderm 2 in (E) dorsal, (F) ventral and (G) lateral views; osteoderm 3 in  
1067 (H) dorsal, (I) ventral and (J) lateral views; osteoderm 4 in (K) dorsal, (L) ventral and (M) lateral views; osteoderm  
1068 5 in (N) dorsal, (O) anterior and (P) lateral views; osteoderm 6 in (Q) dorsal, (R) ventral and (S) lateral views.  
1069 Scale bar equals 5 cm.  
1070



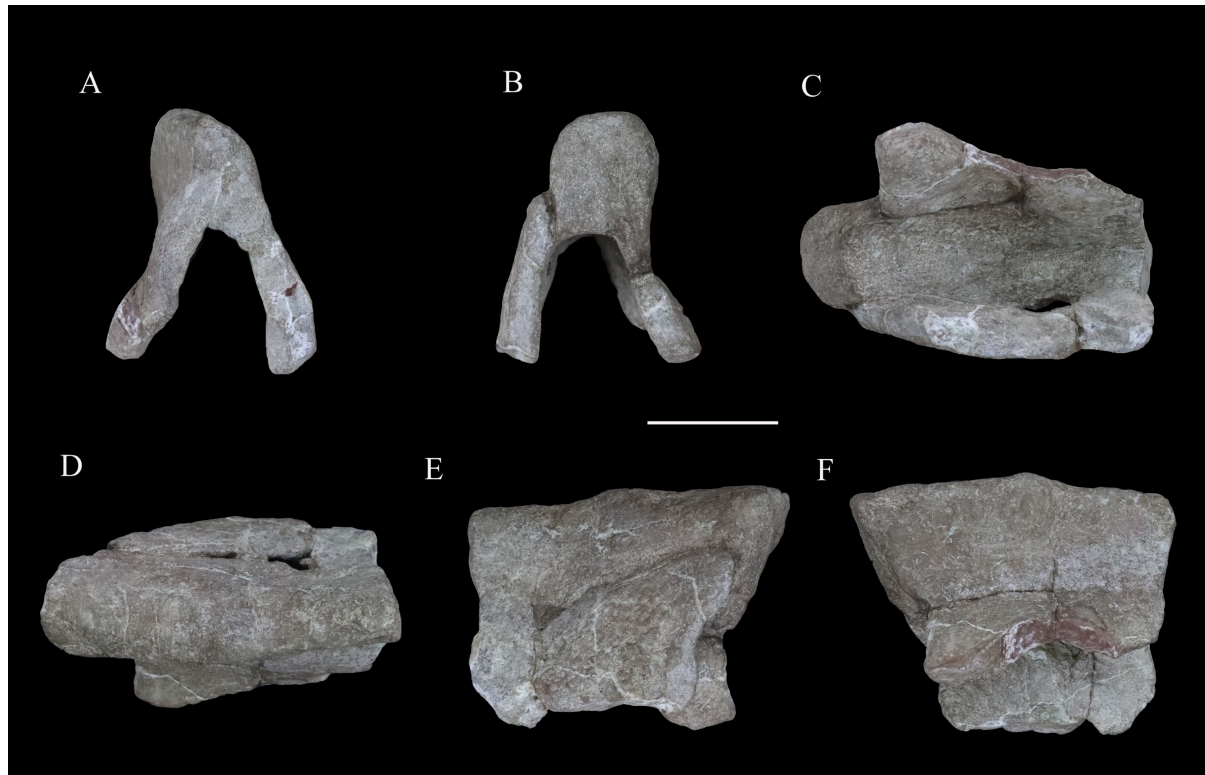

1071  
1072  
1073  
1074  
1075

**Figure 15.** ‘Pup tent’-shaped osteoderm of *Yuxisaurus kopchicki* in (A) posterior, (B) anterior, (C) ventral, (D) dorsal and (E, F) side views. Scale bar equals 10 cm.

1076  
1077

## Phylogenetic analysis

1078

## Methods

1079  
1080  
1081  
1082

In order to investigate the phylogenetic position of *Yuxisaurus kopchicki* it was scored into two recently published data matrices incorporating other early-diverging thyreophorans (Maidment et al., 2020; Norman, 2021) that differ in their taxonomic coverage and in the relationships recovered among these taxa.

1083  
1084  
1085  
1086  
1087  
1088  
1089  
1090  
1091  
1092  
1093

Norman’s (2021) original analysis included 18 taxa scored for 115 characters. We added three new characters: 116, lacrimal ramus of jugal directed horizontally (0) or posteroventrally (1); 117, cervical osteoderms, absent (0), present (1); and 118, surface texture of osteoderms, pitted (0) or smooth (1). With the addition of *Yuxisaurus*, this resulted in a dataset composed of 19 taxa and 118 characters. The data matrix was compiled in Mesquite v. 2.72 (Maddison and Maddison, 2007) and was analysed using TNT v. 1.1 (Goloboff et al., 2008). Following the protocols in Norman (2021), *Silesaurus opolensis* was designated as the outgroup and all characters were of equal weight and unordered. Norman (2021) analysed his data using both Branch and Bound and heuristic searches with Tree Bisection-Reconnection (TBR) in PAUP, whereas our analysis used a ‘traditional’ heuristic search with one random seed and 1,000 replicates of Wagner trees.

1094  
1095  
1096  
1097  
1098  
1099

When scores for *Yuxisaurus kopchicki* were added to the Maidment et al. (2020) matrix this resulted in a dataset composed of 26 taxa and 115 morphological characters. The matrix was analysed in TNT v. 1.1 using ‘traditional’ heuristic search with one random seed and 1,000 replicates of Wagner trees. Following the original settings used in Maidment et al. (2020), *Pisanosaurus* was assigned as the outgroup, and all characters were equally weighted, and characters 105 and 106 were ordered, as were the continuous characters (characters 1–24).

1100 Bremer supports were calculated for both analyses by sequentially increasing the search  
1101 depth to a maximum hold of 11,000 optimal trees and six suboptimal trees in memory to test  
1102 the robustness of each node.

1103

## 1104 **Results**

1105 Analysis of the Norman (2021) dataset resulted in the recovery of six most parsimonious  
1106 trees (MPTs) with tree lengths of 238 steps, a Consistency Index of 0.710 and a Retention  
1107 Index of 0.858. A strict consensus of these trees is shown in Figure 16A. This analysis  
1108 recovered *Scutellosaurus* as the earliest diverging member of a clade that also includes  
1109 *Emausaurus*, *Yuxisaurus*, *Scelidosaurus* and ankylosaurs; and this clade is the sister group of  
1110 stegosaurs. *Yuxisaurus kopchicki* is found in a clade with *Emausaurus* from the Toarcian of  
1111 Germany, but support for this clade is weak (Bremer value of 1). This unnamed clade is in turn  
1112 the sister-group of *Scelidosaurus*+Ankylosauria.

1113 Inclusion of *Yuxisaurus* within the (*Scutellosaurus* (*Emausaurus*+*Yuxisaurus*)  
1114 (*Scelidosaurus*+Ankylosauria)) clade is supported by the possession of the following  
1115 unambiguous synapomorphies: 13(1), cranial exostoses (cortical bone ornamentation) present;  
1116 17(1), remodelling of the external surface of skull bones partial; 105(1), osteoderms form  
1117 parasagittal rows either side of dorsal midline; 108(1), lateral flank osteoderms ovoid and  
1118 keeled; and 117(1), cervical osteoderms present. The unnamed clade including *Yuxisaurus*  
1119 *kopchicki* and *Emausaurus ernsti* is supported by a single synapomorphy: 36(1), basiptyergoid  
1120 process posteroventrolaterally oriented. This clade lacks the three synapomorphies uniting  
1121 *Scelidosaurus*+Ankylosauria, namely: 14(1), skull (non-supraorbital) osteoderms present;  
1122 17(2&3), remodelling of the external surface of skull bones partial with few osteoderms or  
1123 extensively osteoderm covered; and 18(1), postorbital(non-supraorbital) osteoderms present.

1124 The analysis based on the Maidment et al. (2020) dataset produced two most parsimonious  
1125 trees with tree lengths of 269 steps, a Consistency Index of 0.605 and a Retention Index of  
1126 0.663. A strict consensus of the trees is shown in Figure 16B. This analysis recovered  
1127 *Yuxisaurus* within Thyreophora, as an early-diverging branch between *Emausaurus* and  
1128 *Scelidosaurus*. Ankylosauromorpha (sensu Carpenter, 2001; and Norman, 2021; see below)  
1129 was not recovered, *Scutellosaurus* and *Emausaurus* were found outside of Euryopoda, and the  
1130 *Emausaurus*+*Yuxisaurus* clade was not identified. *Yuxisaurus* has a single unambiguous  
1131 synapomorphy of Thyreophora: 29 (1) maxillary tooth row inset medially from the lateral  
1132 surface. It is grouped with *Scelidosaurus* and Euryopoda to the exclusion of *Emausaurus* in  
1133 having the following synapomorphies: 32(1) supraorbitals elements form the dorsal rim of the  
1134 orbit; and 110(1) 'U'-shaped cervical collars composed of keeled scutes present. *Yuxisaurus* is  
1135 excluded from the *Scelidosaurus*+Euryopoda clade as it lacks the unambiguous synapomorphy  
1136 of the latter group: 57(0) cervical vertebrae longer anteroposteriorly than wide transversely.

1137

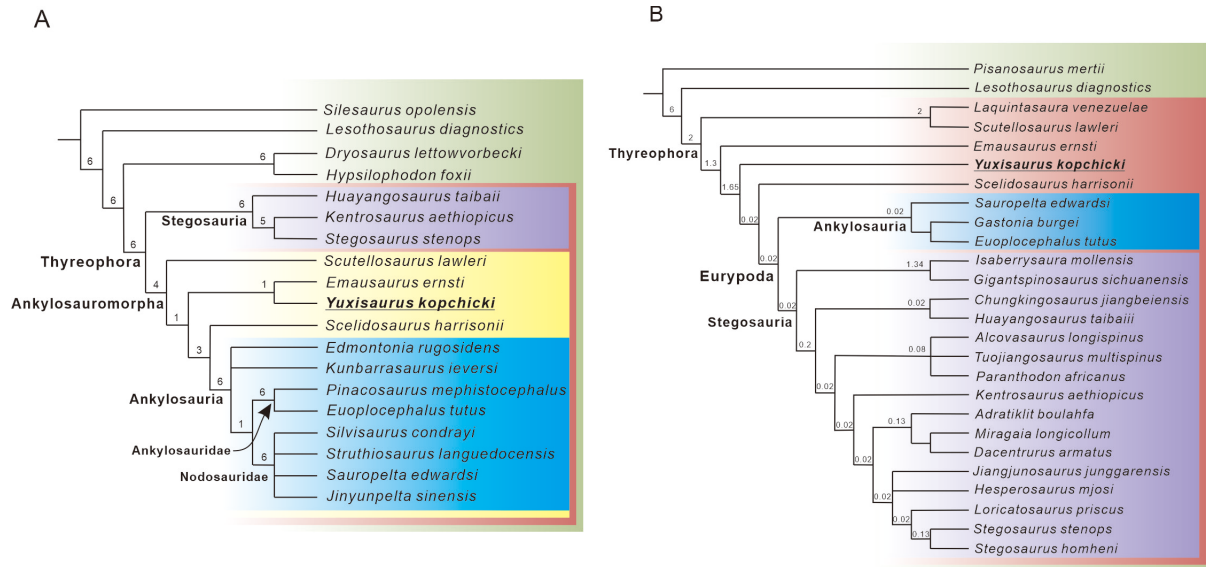

1138

1139

1140

1141

1142

1143

1144

1145

**Figure 16.** Phylogenetic relationships of *Yuxisaurus* within Thyreophora. (A) strict consensus of six most parsimonious trees recovered from analysis of the modified Norman (2021) dataset. (B) strict consensus of two most parsimonious trees recovered from analysis of the modified Maidment et al. (2020) dataset. Bremer support values are shown adjacent to the nodes.

1146

### Comments on Ankylosauromorpha

1147

1148

1149

1150

1151

1152

1153

1154

1155

1156

Carpenter (2001) conducted a phylogenetic analysis that recovered a monophyletic Eurypoda split into two sister lineages, Stegosauria and *Scelidosaurus*+Ankylosauria, with *Emausaurus* and *Scutellosaurus* as successive outgroups to Eurypoda. This result contrasted with previous results where *Scelidosaurus* was excluded from Eurypoda (e.g., Sereno, 1986, 1999). To recognise the new *Scelidosaurus*+Ankylosauria clade Carpenter (2001, p. 471) proposed the name Ankylosauromorpha, which he defined thus: “Ankylosauromorpha are thyreophorans that are closer to *Scelidosaurus*, *Minmi*, Polacanthidae, Nodosauridae, and Ankylosauridae, than to *Stegosaurus*.” However, the ‘ankylosauromorph hypothesis’, was not supported by later analyses, which failed to reproduce this result and consistently placed *Scelidosaurus* outside Eurypoda (e.g., Norman et al., 2004; Butler et al., 2008; Boyd, 2015; Dieudonné et al., 2020).

1157

1158

1159

1160

1161

1162

1163

1164

1165

1166

1167

1168

1169

1170

1171

1172

Subsequently, a new phylogenetic analysis by Norman (2021) provided additional support for a sister-group relationship between *Scelidosaurus* and Ankylosauria. However, this analysis also recovered *Emausaurus* and *Scutellosaurus* as outgroups to this clade, with all of these taxa more closely related to ankylosaurs than stegosaurs. This prompted Norman (2021) to expand Carpenter’s (2001) ankylosauromorph concept to encompass these additional taxa, even though the latter author did not include them within his original definition. Norman’s (2021, p. 70) new definition for Ankylosauromorpha was: “All taxa more closely related to *Euoplocephalus* and *Edmontonia* than to *Stegosaurus*”. However, this definition is functionally identical to the existing stem-based definitions of Ankylosauria provided by Carpenter (1997, p. 16: “All thyreophoran ornithischians closer to *Ankylosaurus* than to *Stegosaurus*”) and Sereno (1998, p. 61: “All eurypods closer to *Ankylosaurus* than *Stegosaurus*”). Hence, the tree topology provided by Norman (2021) implies that *Scutellosaurus*, *Emausaurus*, *Yuxisaurus* and *Scelidosaurus* are ankylosaurs under these previous and broadly applied phylogenetic definitions; consequently, Norman’s (2021) stem-based use of ‘Ankylosauromorpha’ is in error and his redefinition of the clade redundant. However, if Norman’s (2021) topology were to receive further support in future, a case could be made for a node-based definition of

1173 Ankylosauromorpha (e.g., a clade consisting of *Scelidosaurus*, *Ankylosaurus*, their common  
1174 ancestor and all of its descendants) or some other variation.

1175

## 1176 Discussion

1177

1178 The discovery of *Yuxisaurus* cements the presence of armoured dinosaurs in the Early  
1179 Jurassic of Eastern Asia, an observation previously supported by the fragmentary material  
1180 assigned to ‘*Tatisaurus*’ and ‘*Bienosaurus*’ (Simmons, 1965; Dong, 2001). The inadequate  
1181 type specimens of the latter taxa do not allow them to be incorporated into formal phylogenetic  
1182 or macroevolutionary analyses (Norman et al., 2007; Raven et al., 2019), and the only other  
1183 Early Jurassic thyreophoran material reported from Asia – from the Kota Formation of India  
1184 (Nath et al., 2002; Galton, 2019) – is also frustratingly incomplete (and might be of Middle  
1185 Jurassic age: Prasad and Parmar, 2020). Hence, it has been impossible to include any Asian  
1186 taxa in broad-scale tree-based analyses of early thyreophoran evolutionary history thus far.  
1187 However, the more complete, and highly distinctive, material of *Yuxisaurus* enables some more  
1188 substantive discussion of these issues.

1189 For example, until relatively recently all of the valid Early Jurassic thyreophoran taxa  
1190 included in such analyses were from North America (*Scutellosaurus*) or Europe (*Emausaurus*,  
1191 *Scelidosaurus*) limiting our ability to determine their biogeographic history beyond suggesting  
1192 a Laurasian distribution (e.g., Sereno, 1999; Norman et al., 2004). However, new phylogenetic  
1193 analyses have proposed that two other taxa, *Lesothosaurus* and *Laquintasaura*, might be early  
1194 members of Thyreophora (e.g., Butler et al., 2008; Boyd, 2015; Baron et al., 2017a; Raven and  
1195 Maidment, 2017; Maidment et al., 2020), although these views are contentious and alternative  
1196 relationships for these taxa have been posited (e.g., Dieudonné et al., 2020; Barta and Norell,  
1197 2021; Norman, 2021). If *Lesothosaurus* and *Laquintasaura* are thyreophorans, however, this  
1198 broadens the palaeogeographic distribution of the clade to Gondwana in the earliest Jurassic,  
1199 with *Laquintasaura* from the Hettangian of Venezuela (Barrett et al., 2014) and *Lesothosaurus*  
1200 from the Sinemurian of southern Africa (Viglietti et al., 2020), implying that the group might  
1201 have originated in Gondwana and dispersed to Laurasia (Boyd, 2015; Raven et al., 2019;  
1202 Maidment et al., 2020).

1203 The two phylogenetic analyses we selected to assess the relationships of *Yuxisaurus* reflect  
1204 differing opinions on the relationships of *Lesothosaurus* and underscore current uncertainties  
1205 in early ornithischian biogeography. In our iteration of the Norman (2021) analysis (see  
1206 Results, above), *Lesothosaurus* is recovered as a non-thyreophoran ornithischian and, as a  
1207 result, *Yuxisaurus* belongs to a grade of early diverging thyreophoran taxa whose entire early  
1208 evolutionary history is confined to Laurasia. This scenario implies that all later-occurring  
1209 Gondwanan taxa were dispersals from Eurasia. The sister-group relationship of *Yuxisaurus* and  
1210 *Emausaurus* implies a pan-Eurasian distribution for this small clade, but taken with the North  
1211 American distribution of the earlier-diverging *Scutellosaurus* and the European occurrence of  
1212 the later-diverging *Scelidosaurus*, there is no clear biogeographic signal within the broader  
1213 Laurasian region. By contrast, the tree topology gained from analysis of the Maidment et al.  
1214 (2020) dataset (see Results, above) recovers *Lesothosaurus* as a thyreophoran and implies  
1215 Gondwanan origins for the group, with the corollary that *Yuxisaurus* is a member of a radiation  
1216 that occurred following dispersal from this ancestral area to Laurasia. Unfortunately, the lack  
1217 of consensus on early ornithischian phylogeny prevents us from choosing between these two  
1218 equally well-supported scenarios: specimens from currently unsampled areas, new anatomical  
1219 data and agreement on character coding and scoring decisions will be required to move this  
1220 debate forwards.

1221 Minimally, however, the recognition of *Yuxisaurus* further highlights that thyreophorans  
1222 achieved a global (or pan-Laurasian) distribution rapidly during their early history, perhaps in



1223 the space of only 2–3 million years (up to a maximum of ~10 Ma) (see also Raven et al., 2019).  
1224 This time scale is suggested by the current absence of the Triassic ornithischians (unless  
1225 silesaurids are considered members of this clade: Müller and Garcia, 2020) and the occurrences  
1226 of the earliest diverging members of Thyreophora, which all have potential first appearance  
1227 dates ranging from Hettangian–Sinemurian (201.3–190.8 Ma: Walker et al., 2018).

1228 Early thyreophorans have been recovered in a diverse range of palaeoenvironmental and  
1229 taphonomic settings and as components of remarkably different ecosystems, suggesting that  
1230 their early radiation might have been underpinned by greater ecological diversity among them  
1231 than usually appreciated. For example, *Lesothosaurus*, *Laquintasaura* and *Scutellosaurus* were  
1232 likely obligate bipeds (Thulborn, 1972; Colbert, 1981; Barrett et al., 2014), whereas the more  
1233 heavily built *Yuxisaurus* and *Scelidosaurus* were likely facultative quadrupeds (Maidment et  
1234 al., 2014; Norman, 2021). Moreover, there is some evidence of dietary variation with the  
1235 possibility that *Lesothosaurus* was a facultative omnivore (Barrett, 2000), whereas  
1236 *Scelidosaurus* is thought to have been an obligate herbivore (Barrett, 2001; Norman, 2021).  
1237 Early members of the clade, like *Lesothosaurus* and *Laquintasaura*, were apparently  
1238 unarmoured (Thulborn, 1972; Barrett et al., 2014), but armour became a conspicuous feature  
1239 of all later-diverging members of the group (Norman et al., 2004) and varied considerably even  
1240 in the earliest appearing taxa (Colbert, 1981; Norman, 2020c; this paper). Several early  
1241 experiments in sociality and group-living are inferred based on mass accumulations of several  
1242 taxa (Barrett et al., 2014, 2016). In terms of habitats, *Emausaurus* and *Scelidosaurus* are known  
1243 from marine settings (Haubold, 1990; Norman, 2020a), suggesting that they lived in low-lying  
1244 well-watered coastal areas, but other taxa, such as *Lesothosaurus* are known from settings that  
1245 were far inland and at least seasonally arid (Viglietti et al., 2020). Finally, several  
1246 thyreophorans represent the most abundant dinosaur taxa known from their respective  
1247 formations (e.g., *Scelidosaurus*, *Scutellosaurus* and *Laquintasaura* which are each represented  
1248 by multiple specimens: Colbert, 1981; Barrett et al., 2014; Norman, 2020a; Breeden et al.,  
1249 2021), but in other cases they seem to be subordinate components of their ecosystems (for  
1250 example, *Lesothosaurus* is known from multiple specimens but is much less abundant than the  
1251 sauropodomorph dinosaurs from the upper Elliot Formation: Knoll, 2005; Viglietti et al., 2020)  
1252 or rather rare (e.g., *Yuxisaurus*, which also occurs in a sauropodomorph-dominated fauna: Mao  
1253 et al., 2020).

1254

## 1255 **Conclusions**

1256

1257 A partial skeleton collected from the Lower Jurassic Fengjiahe Formation of Yunnan  
1258 Province, China, represents a new taxon of early diverging thyreophoran dinosaur, which we  
1259 name *Yuxisaurus kopchicki* (Figure 17). It can be distinguished from all other thyreophorans  
1260 by a suite of apomorphic cranial, axial and appendicular character states, as well as a unique  
1261 combination of character states. *Yuxisaurus* represents the first armoured dinosaur to be  
1262 recovered from Asia that is based on associated, diagnostic material and is the first that is  
1263 complete enough to be incorporated into a phylogenetic analysis. Although its relationships are  
1264 heavily dependent on the preferred dataset, our analyses recover *Yuxisaurus* as an outgroup to  
1265 either *Scelidosaurus*+Ankylosauria or *Scelidosaurus*+Eurypoda, with the former analysis also  
1266 suggesting a sister-group relationship to the European taxon *Emausaurus*. *Yuxisaurus* helps to  
1267 emphasize the pan-Laurasian (and possibly global) distribution of early thyreophorans, their  
1268 diverse morphology and ecology, and the rapidity of their initial radiation.

1269

1270

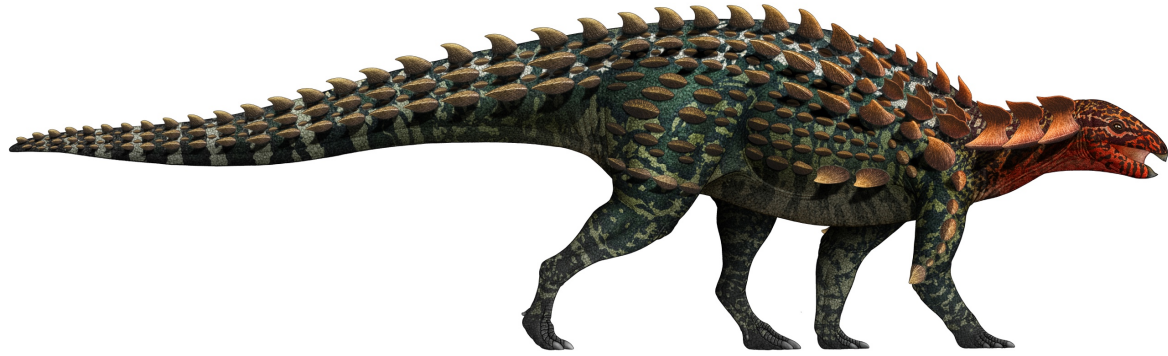

1271  
1272  
1273  
1274  
1275

**Figure 17.** Life restoration of *Yuxisaurus kopchicki*. The osteoderm arrangement is hypothetical but that includes many of the types of armour found with the skeleton.

## 1276 Acknowledgements

1277

1278 The authors would like to thank the field crew of Yimen Administration of Cultural Heritage  
1279 for their efforts in the discovery, excavation and preliminary preparation of this specimen. We  
1280 thank X. Hou and Y. He for assistance; Z. Yang for preparation; Y. Chen and R. Jiang for help  
1281 with illustration; H. Xing for suggestions; and S. Maidment for discussion. The phylogenetic  
1282 analysis software TNT version 1.1 was provided by generosity of the Willi Hennig Society.  
1283 Support for this research is from the Double First-Class joint program of Science & Technology  
1284 Department of Yunnan and Yunnan University (2018FY001-005).

1285  
1286

## 1287 Additional files

1288 Supplementary File 1. Data matrix modified from Norman (2021) used in the phylogenetic  
1289 analysis (in tnt format).

1290 Supplementary File 2. Data matrix modified from Maidment et al. (2020) used in the  
1291 phylogenetic analysis (in txt format).

1292

1293 Transparent reporting form

1294

## 1295 Data availability

1296 All data generated or analysed during this study are included in the manuscript and supporting  
1297 files.

1298

## 1299 References

1300

1301 **Arbour VM**, Currie PJ. 2016. Systematics, phylogeny and palaeobiogeography of the ankylosaurid  
1302 dinosaurs. *Journal of Systematic Palaeontology* **14**:385–444. DOI:  
1303 <https://doi.org/10.1080/14772019.2015.1059985>

1304 **Bai Z**. 1999. Dinosaur fauna from Yuxi area, Yunnan Province. In: Wang YQ, Deng T, editors, *Proceedings*  
1305 *of the Seventh Annual Meeting of the Chinese Society of Vertebrate Paleontology* Beijing: China Ocean  
1306 Press, pp. 109–116. [In Chinese, with English abstract]

1307 **Bai Z**, Yang J, Wang G. 1990. [*Yimenosaurus*, a new genus of Prosauropoda from Yimen County, Yunnan  
1308 Province]. *Yuxiwenbo [Yuxi Culture and Scholarship]* **1**:14–23. [In Chinese]

1309 **Baron MG**, Norman DB, Barrett PM. 2017a. A new hypothesis of dinosaur relationships and early dinosaur  
1310 evolution. *Nature* **543**:501–506. DOI: <https://doi.org/10.1038/nature21700>, PMID: 28332513

- 1311 **Baron MG**, Norman DB, Barrett PM. 2017b. Postcranial anatomy of *Lesothosaurus diagnosticus*  
1312 (Dinosauria: Ornithischia) from the Lower Jurassic of southern Africa: implications for basal  
1313 ornithischian taxonomy and systematics. *Zoological Journal of the Linnean Society* **179**:125–168. DOI:  
1314 <https://doi.org/10.1111/zoj.12434>
- 1315 **Barrett PM**. 2000. Prosauropods and iguanas: speculation on the diets of extinct reptiles. In: Sues HD,  
1316 editor, *Evolution of Herbivory in Terrestrial Vertebrates: Perspectives from the Fossil Record*.  
1317 Cambridge: Cambridge University Press, pp. 42–78.
- 1318 **Barrett PM**. 2001. Tooth wear and possible jaw action of *Scelidosaurus harrisonii* Owen and a review of  
1319 feeding mechanisms in other thyreophoran dinosaurs. In: Carpenter K, editor, *The Armored Dinosaurs*.  
1320 Bloomington and Indianapolis: Indiana University Press, pp. 25–52.
- 1321 **Barrett PM**, Butler RJ, Mundil R, Scheyer TM, Irmis RB, Sánchez-Villagra MR. 2014. A palaeoequatorial  
1322 ornithischian and new constraints on early dinosaur diversification. *Proceedings of the Royal Society B*  
1323 **281**:20141147. DOI: <https://doi.org/10.1098/rspb.2014.1147>, PMID: 25100698
- 1324 **Barrett PM**, Butler RJ, Yates AM, Baron MG, Choiniere JN. 2016. New specimens of the basal  
1325 ornithischian dinosaur *Lesothosaurus diagnosticus* Galton, 1978 from the Early Jurassic of South Africa.  
1326 *Palaeontologia africana* **50**:48–63. DOI: <http://wiredspace.wits.ac.za/handle/10539/19886>
- 1327 **Barta DE**, Norell MA. 2021. The osteology of *Haya griva* (Dinosauria: Ornithischia) from the Late  
1328 Cretaceous of Mongolia. *Bulletin of the American Museum of Natural History* **445**:1–112. DOI:  
1329 <https://doi.org/10.1206/0003-0090.445.1.1>
- 1330 **Blows WT**. 2001. Dermal armor of the polacanthine dinosaurs. In: Carpenter K, editor, *The Armored*  
1331 *Dinosaurs*. Bloomington and Indianapolis: Indiana University Press, pp. 363–385.
- 1332 **Blows WT**, Honeysett K. 2014. First Valanginian *Polacanthus foxii* (Dinosauria, Ankylosauria) from  
1333 England, from the Lower Cretaceous of Bexhill, Sussex. *Proceedings of the Geologists' Association*  
1334 **125**:233–251. DOI: <https://doi.org/10.1016/j.pgeola.2014.01.002>
- 1335 **Boyd CA**. 2015. The systematic relationships and biogeographic history of ornithischian dinosaurs. *PeerJ*  
1336 **3**:e1523. DOI: <https://doi.org/10.7717/peerj.1523>, PMID: 26713260
- 1337 **Brandon K**, Carpenter K. 2005. Redescription of *Gargoyleosaurus parkpinorum*, a polacanthid ankylosaur  
1338 from the Upper Jurassic of Albany County, Wyoming. *Neues Jahrbuch für Geologie und Paläontologie,*  
1339 *Abhandlungen* **237**:111–160.
- 1340 **Breden BT III**, Rowe TB. 2020. New specimens of *Scutellosaurus lawleri* Colbert, 1981, from the Lower  
1341 Jurassic Kayenta Formation in Arizona elucidate the early evolution of thyreophoran dinosaurs. *Journal*  
1342 *of Vertebrate Paleontology* **40**:e1791894. DOI: <https://doi.org/10.1080/02724634.2020.1791894>
- 1343 **Breden BT**, Raven TJ, Butler RJ, Rowe TB, Maidment SCR. 2021. The anatomy and palaeobiology of the  
1344 early armoured dinosaur *Scutellosaurus lawleri* (Ornithischia: Thyreophora) from the Kayenta Formation  
1345 (Lower Jurassic) of Arizona. *Royal Society Open Science* **8**:201676. DOI:  
1346 <http://doi.org/10.1098/rsos.201676>, PMID: 34295511
- 1347 **Brochu CA**. 1996. Closure of neurocentral sutures during crocodylian ontogeny: implications for maturity  
1348 assessment in fossil archosaurs. *Journal of Vertebrate Paleontology* **16**:49–62. DOI:  
1349 <https://doi.org/10.1080/02724634.1996.10011283>
- 1350 **Burns ME**, Currie PJ. 2014. External and internal structure of ankylosaur (Dinosauria, Ornithischia)  
1351 osteoderms and their systematic relevance. *Journal of Vertebrate Paleontology* **34**:835–851.  
1352 DOI:<https://doi.org/10.1080/02724634.2014.840309>
- 1353 **Butler RJ**, Upchurch P, Norman DB. 2008. The phylogeny of the ornithischian dinosaurs *Journal of*  
1354 *Systematic Palaeontology* **6**:1–40. DOI: <https://doi.org/10.1017/S1477201907002271>, PMID: 26713260
- 1355 **Carpenter K**. 1984. Skeletal reconstruction and life restoration of *Sauropelta* (Ankylosauria: Nodosauridae)  
1356 from the Cretaceous of North America. *Canadian Journal of Earth Sciences* **21**:1491–1498. DOI:  
1357 <https://doi.org/10.1139/e84-154>
- 1358 **Carpenter K**. 1997. Ankylosauria. In Currie PJ, Padian K, editors, *Encyclopedia of Dinosaurs*. San Diego:  
1359 Academic Press, pp. 16–20.
- 1360 **Carpenter K**. 2001. Phylogenetic analysis of the Ankylosauria. In: Carpenter K, editor, *The Armored*  
1361 *Dinosaurs*. Bloomington and Indianapolis: Indiana University Press, pp. 455–483.
- 1362 **Carpenter K**, Hayashi S, Kobayashi Y, Maryńska T, Barsbold R, Sato K, Obata I. 2011. *Saichania*  
1363 *chulsanensis* (Ornithischia, Ankylosauridae) from the Upper Cretaceous of Mongolia.  
1364 *Palaeontographica, Abteilung A* **294**:1–61. DOI: <http://dx.doi.org/10.1127/pala/294/2011/1>
- 1365 **Carpenter K**, Miles C, Cloward K. 1998. Skull of a Jurassic ankylosaur (Dinosauria). *Nature* **393**:782–783.  
1366 DOI: <https://doi.org/10.1038/31684>

- 1367 **Chen PJ**, Li WB, Chen JH, Ye CH, Wang Z, Shen YB, Sun DL. 1982. Stratigraphical classification of  
1368 Jurassic and Cretaceous in China. *Scientia Sinica (Series B)* **25**:1227–48.
- 1369 **Colbert EH**. 1981. A primitive ornithischian dinosaur from the Kayenta Formation of Arizona. *Museum of*  
1370 *Northern Arizona Bulletin* **53**:1–61.
- 1371 **Diudonné PE**, Cruzado-Caballero P, Godefroit P, Tortosa T. 2020. A new phylogeny of cerapodan  
1372 dinosaurs. *Historical Biology*. DOI: <https://doi.org/10.1080/08912963.2020.1793979>, PMID: 26713260
- 1373 **Dong ZM**. 1992. *The Dinosaurian Faunas of China*. Berlin: Springer-Verlag, 188 pp.  
1374 DOI: <https://doi.org/10.3366/anh.1993.20.1.130a>
- 1375 **Dong ZM**. 2001. Primitive armored dinosaur from the Lufeng Basin, China In: Tanke DH, Carpenter K,  
1376 editors, *Mesozoic Vertebrate Life*. Bloomington and Indianapolis: Indiana University Press, 237–243.
- 1377 **Eaton TH Jr**. 1960. A new armored dinosaur from the Cretaceous of Kansas University of Kansas,  
1378 *Paleontological Contributions (Vertebrata)* **8**:1–24.
- 1379 **Fang XS**, Li PX, Zhang ZJ, Cheng ZW, Pang QQ, Zhang ZX, Huang BC. 2008. *Jurassic red beds in central*  
1380 *Yunnan*. Beijing: Geological publishing House, 1–111 (in Chinese).
- 1381 **Ford T**. 2000. A review of ankylosaur osteoderms from New Mexico and a preliminary review of ankylosaur  
1382 armor. *New Mexico Museum of Natural History and Science, Bulletin* **17**:157–176.
- 1383 **Galton PM**. 1983. Armored dinosaurs (Ornithischia: Ankylosauria) from the Middle and Upper Jurassic of  
1384 Europe. *Palaeontographica, Abteilung A* **182**:1–25.
- 1385 **Galton PM**. 1988. Skull bones and endocranial casts of the stegosaurian dinosaur *Kentrosaurus* Hennig,  
1386 1915 from the Upper Jurassic of Tanzania, East Africa. *Geologica et Paleontologica* **22**:123–143.
- 1387 **Galton PM**. 2019. Earliest record of an ankylosaurian dinosaur (Ornithischia: Thyreophora): dermal armor  
1388 from Lower Kota Formation (Lower Jurassic) of India. *Neues Jahrbuch für Geologie und Paläontologie,*  
1389 *Abhandlungen* **291**:205–219. DOI: 10.1127/njgpa/2019/0800
- 1390 **Galton PM**, Upchurch P. 2004. Stegosauria In: Weishampel DB, Dodson P, Osmólska H, editors, *The*  
1391 *Dinosauria (Second Edition)*. Berkeley: University of California Press, pp. 343–362. DOI:  
1392 <http://dx.doi.org/10.1525/california/9780520242098.003.0019>
- 1393 **Gilmore CW**. 1914. Osteology of the armored Dinosauria in the United States National Museum, with  
1394 reference to the genus *Stegosaurus*. *Bulletin of the United States National Museum Bulletin* **89**:1–143.  
1395 DOI: <http://dx.doi.org/10.5962/bhl.title.63658>
- 1396 **Godefroit P**, Pereda-Suberbiola X, Li H, Dong ZM. 1999. A new species of the ankylosaurid dinosaur  
1397 *Pinacosaurus* from the Late Cretaceous of Inner Mongolia (PR China). *Bulletin de l'Institut Royal des*  
1398 *Sciences Naturelles de Belgique, Sciences de la Terre* **69**:17–36.
- 1399 **Goloboff PA**, Farris JS, Nixon KC. 2008. TNT, a free program for phylogenetic analysis. *Cladistics* **24**:774–  
1400 786. DOI: <https://doi.org/10.1111/j.1096-0031.2008.00217.x>
- 1401 **Haubold H**. 1990. Ein neuer Dinosaurier (Ornithischia, Thyreophora) aus dem unteren Jura des nordlichen  
1402 Mitteleuropa. *Revue de Paleobiologie* **9**:149–177.
- 1403 **Huang B**, Li Y, Fang X, Sun D, Pang Q, Cheng Z, Li P. 2005. Magnetostratigraphy of the Jurassic in Lufeng,  
1404 central Yunnan. *Geological Bulletin of China* **24**:322–328.
- 1405 **Kilbourne B**, Carpenter K. 2005. Redescription of *Gargoyleosaurus parkpinorum*, a polacanthid ankylosaur  
1406 from the Upper Jurassic of Albany County, Wyoming. *Neues Jahrbuch für Geologie und Paläontologie,*  
1407 *Abhandlungen* **237**:111–160. DOI: <http://dx.doi.org/10.1127/njgpa/235/2005/111>
- 1408 **Kinneer B**, Carpenter K, Shaw A. 2016. Redescription of *Gastonia burgei* (Dinosauria: Ankylosauria,  
1409 Polacanthidae), and description of a new species. *Neues Jahrbuch für Geologie und Paläontologie,*  
1410 *Abhandlungen* **282**:37–80. DOI: <https://doi.org/10.1127/njgpa/2016/0605>
- 1411 **Kirkland JI**, Carpenter K. 1994. North America's first pre-Cretaceous ankylosaur (Dinosauria) from the  
1412 Upper Jurassic Morrison Formation of western Colorado. *Brigham Young University Geology Studies*  
1413 **40**:25–42.
- 1414 **Kirkland JI**, Alcalá L, Loewen MA, Espílez E, Mampel L, Wiersma JP. 2013. The basal nodosaurid  
1415 ankylosaur *Europelta carbonensis* n. gen., n. sp. from the Lower Cretaceous (lower Albian) Escucha  
1416 Formation of northeastern Spain. *PLoS ONE* **8**:e80405. DOI:  
1417 <https://doi.org/10.1371/journal.pone.0080405>, PMID: 24312471
- 1418 **Knoll F**. 2005. The tetrapod fauna of the upper Elliot and Clarens formations in the main Karoo Basin (South  
1419 Africa and Lesotho). *Bulletin de la Société Géologique de France* **176**:81–91. DOI:  
1420 <https://doi.org/10.2113/176.1.81>
- 1421 **Lee YN**. 1996. A new nodosaurid ankylosaur (Dinosauria: Ornithischia) from the Paw Paw Formation (late  
1422 Albian) of Texas. *Journal of Vertebrate Paleontology* **16**:232–245. DOI:  
1423 <https://doi.org/10.1080/02724634.1996.10011311>



- 1424 **Luo ZX**, Wu XC. 1994. The small tetrapods of the Lower Lufeng Formation, Yunnan, China In: Fraser NC,  
1425 Sues HD, editors, *In the Shadow of the Dinosaurs: Early Mesozoic Tetrapods*. New York: Cambridge  
1426 University Press, pp. 251–270.
- 1427 **Maddison W**, Maddison D. 2007. Mesquite 2. A modular system for evolutionary analysis. Available online  
1428 at: <http://www.mesquiteproject.org>.
- 1429 **Maidment SCR**, Bates KT, Falkingham PL, VanBuren C, Arbour V, Barrett PM. 2014. Locomotion in  
1430 ornithischian dinosaurs: an assessment using three-dimensional computational modelling. *Biological*  
1431 *Reviews* **89**:588–617. DOI: <https://doi.org/10.1111/brv.12071>, PMID: 24251809
- 1432 **Maidment SCR**, Brassey C, Barrett PM. 2015. The postcranial skeleton of an exceptionally complete  
1433 individual of *Stegosaurus stenops* (Dinosauria: Thyreophora) from the Upper Jurassic Morrison  
1434 Formation of Wyoming, U.S.A. *PLoS ONE* **10**:e0138352. DOI:  
1435 <https://doi.org/10.1371/journal.pone.0138352>, PMID: 26466098
- 1436 **Maidment SCR**, Raven TJ, Ouarhache D, Barrett PM. 2020. North Africa's first stegosaur: implications for  
1437 Gondwanan thyreophoran dinosaur diversity. *Gondwana Research* **77**:82–97. DOI:  
1438 <https://doi.org/10.1016/j.gr.2019.07.007>
- 1439 **Maidment SCR**, Strachan SJ, Ouarhache D, Scheyer TM, Brown EE, Fernandez V, Johanson Z, Raven TJ,  
1440 Barrett PM. 2021. Bizarre dermal armour suggests the first African ankylosaur. *Nature Ecology and*  
1441 *Evolution*. DOI: <https://doi.org/10.1038/s41559-021-01553-6>, PMID: 34556830
- 1442 **Maleev EA** .1956. [Armored dinosaurs from the Upper Cretaceous of Mongolia] *Trudy*  
1443 *Paleontologiceskogo Instituta Akademii Nauk SSSR* **62**:51–91. [In Russian]
- 1444 **Mao L**, Xing L, Zhang JP, Wang T., Wang DH. 2020. Revisiting the world famous Lufeng Formation  
1445 dinosaur fauna: new approaches to old problems. *Historical Biology* **32**:1062–1070. DOI:  
1446 <https://doi.org/10.1080/08912963.2018.1563784>
- 1447 **Maryanska T**. 1971. New data on the skull of *Pinacosaurus grangeri* (Ankylosauria). *Palaeontologia*  
1448 *Polonica* **25**:45–53.
- 1449 **Maryanska T**. 1977. Ankylosauridae (Dinosauria) from Mongolia. *Palaeontologia Polonica* **37**:85–151.
- 1450 **Müller RT**, Garcia MS. 2020. A paraphyletic 'Silesauridae' as an alternative hypothesis for the initial  
1451 radiation of ornithischian dinosaurs. *Biology Letters* **16**:2020.0417. DOI:  
1452 <https://doi.org/10.1098/rsbl.2020.0417>, PMID: 32842895
- 1453 **Nath TT**, Yadagiri P, Moitra AK. 2002. First record of armoured dinosaur from the Lower Jurassic Kota  
1454 Formation, Pranhita-Godavari Valley, Andhra Pradesh. *Journal of the Geological Society of India*  
1455 **59**:575–576.
- 1456 **Nopcsa F**. 1915. Die Dinosaurier der Siebenbürgischen Landesteile Ungarns. *Mitteilungen aus dem*  
1457 *Jahrbuche der Königlich Ungarischen Geologischen Anstalt* **23**:1–26.
- 1458 **Norman DB**. 1984. A systematic reappraisal of the reptile order Ornithischia In: Reif WE, Westphal F,  
1459 editors, *Third Symposium on Mesozoic Terrestrial Ecosystems, Short Papers*. Tubingen: Attempto  
1460 Verlag, pp. 157–162.
- 1461 **Norman DB**. 2020a. *Scelidosaurus harrisonii* from the Early Jurassic of Dorset, England: cranial anatomy.  
1462 *Zoological Journal of the Linnean Society* **188**:1–81. DOI:<https://doi.org/10.1093/zoolinnea/zlz074>
- 1463 **Norman DB**. 2020b. *Scelidosaurus harrisonii* Owen, 1861 from the Early Jurassic of Dorset, England: Part  
1464 2. Postcranial Skeleton. *Zoological Journal of the Linnean Society* **189**:47–157. DOI:  
1465 <https://doi.org/10.1093/zoolinnea/zlz078>
- 1466 **Norman DB**. 2020c. *Scelidosaurus harrisonii* from the Early Jurassic of Dorset, England: the dermal  
1467 skeleton. *Zoological Journal of the Linnean Society* **190**:1–53. DOI:  
1468 <https://doi.org/10.1093/zoolinnea/zlz085>
- 1469 **Norman DB**. 2021. *Scelidosaurus harrisonii* Owen, 1861 (Dinosauria: Ornithischia) from the Early Jurassic  
1470 of Dorset, England: biology and phylogenetic relationships. *Zoological Journal of the Linnean Society*  
1471 **191**:1–86. DOI:<https://doi.org/10.1093/zoolinnea/zlza061>
- 1472 **Norman DB**, Butler RJ, Maidment SCR. 2007. Reconsidering the status and affinities of the ornithischian  
1473 dinosaur *Tatisaurus oehleri* Simmons, 1965. *Zoological Journal of the Linnean Society* **150**:865–874.  
1474 DOI: <https://doi.org/10.1111/j.1096-3642.2007.00301.x>
- 1475 **Norman DB**, Witmer LM, Weishampel DB. 2004. Basal Thyreophora In: Weishampel DB, Dodson P,  
1476 Osmólska H, editors, *The Dinosauria (Second Edition)*. Berkeley: University of California Press, pp.  
1477 335–342. DOI:<http://dx.doi.org/10.1525/california/9780520242098.003.0018>
- 1478 **Owen R**. 1842. Report on British fossil reptiles. *Reports of the British Association for the Advancement of*  
1479 *Science* **11**:60–204.

- 1480 **Owen R.** 1861. Monograph on the British fossil Reptilia from the Oolitic Formations. Part One. A  
1481 monograph of a fossil dinosaur (*Scelidosaurus harrisonii*, Owen). *Palaeontographical Society*  
1482 *Monographs* **13**(Number 56):1–14. DOI: <https://doi.org/10.1080/02693445.1861.12027929>
- 1483 **Owen R.** 1863. Monograph on the British fossil Reptilia from the Oolitic Formations. Part Two.  
1484 *Scelidosaurus harrisonii*. *Palaeontographical Society Monographs* **14**:(Number 60):1–26. DOI:  
1485 <https://doi.org/10.1080/02693445.1863.12027933>
- 1486 **Padian K.** 1989. Presence of the dinosaur *Scelidosaurus* indicates Jurassic age for the Kayenta Formation  
1487 (Glen Canyon Group, northern Arizona). *Geology* **17**:438–441. DOI: [http://dx.doi.org/10.1130/0091-](http://dx.doi.org/10.1130/0091-7613(1989)017%3C0438:POTDSI%3E2.3.CO;2)  
1488 [7613\(1989\)017%3C0438:POTDSI%3E2.3.CO;2](http://dx.doi.org/10.1130/0091-7613(1989)017%3C0438:POTDSI%3E2.3.CO;2)
- 1489 **Pang Q,** Fang X, Zhang Z, Li Ya, Li P, Cheng Z. 2002. Establishment of the Yubacun Formation and the  
1490 lower boundary of the continental Jurassic in central Yunnan. *Geological Review* **48**:1–8. [In Chinese]  
1491 DOI: <https://doi.org/10.16509/j.georeview.2002.01.001>
- 1492 **Peyer de Fabrègues C,** Bi SD, Li HQ, Li G, Yang L, Xu X. 2020. A new species of early-diverging  
1493 Sauropodiformes from the Lower Jurassic Fengjiahe Formation of Yunnan Province, China. *Scientific*  
1494 *Reports* **10**:10961. DOI: <https://doi.org/10.1038/s41598-020-67754-4>, PMID: 32620800
- 1495 **Porro LB,** Witmer LM, Barrett PM. 2015. Digital preparation and osteology of the skull of *Lesothosaurus*  
1496 *diagnosticus*. *PeerJ* **3**:e1494. DOI: <https://doi.org/10.7717/peerj.1494>, PMID: 26713245
- 1497 **Prasad GVR,** Parmar V. 2020. First ornithischian and theropod dinosaur teeth from the Middle Jurassic  
1498 Kota Formation of India: paleobiogeographic relationships. In: Prasad G, Patnaik R, editors, *New*  
1499 *Perspectives on Post-Gondwana Break-up – A Tribute to Ashok Sahni*. Switzerland: Springer Nature, pp.  
1500 1–30. DOI: [https://doi.org/10.1007/978-3-030-49753-8\\_1](https://doi.org/10.1007/978-3-030-49753-8_1)
- 1501 **Raven TJ,** Maidment SCR. 2017. A new phylogeny of Stegosauria (Dinosauria: Ornithischia).  
1502 *Palaeontology* **60**:401–408. DOI: <https://doi.org/10.1111/pala.12291>
- 1503 **Raven TJ,** Barrett PM, Xu X, Maidment SCR. 2019. A reassessment of the purported ankylosaurian  
1504 dinosaur *Bienosaurus lufengensis* from the Lower Lufeng Formation of Yunnan, China. *Acta*  
1505 *Palaeontologica Polonica* **64**:335–342. DOI: <https://doi.org/10.4202/app.00577.2018>
- 1506 **Rosenbaum JN,** Padian K. 2000. New material of the basal thyreophoran *Scutellosaurus lawleri* from the  
1507 Kayenta Formation (Lower Jurassic) of Arizona. *PaleoBios* **20**:13–23.
- 1508 **Salgado L,** Canudo JI, Garrido AC, Moreno-Azanza M, Martínez LCA, Coria RA, Gasca JM. 2017. A new  
1509 primitive neornithischian dinosaur from the Jurassic of Patagonia with gut contents. *Scientific Reports*  
1510 **7**:42778. DOI: <https://doi.org/10.1038/srep42778>, PMID: 28202910
- 1511 **Seeley HG.** 1887. On the classification of the fossil animals commonly named Dinosauria. *Proceedings of*  
1512 *the Royal Society of London* **43**:165–171. DOI: <https://doi.org/10.1098/rspl.1887.0117>
- 1513 **Sereno PC.** 1986. Phylogeny of the bird-hipped dinosaurs (Order Ornithischia). *National Geographic*  
1514 *Research* **2**:234–256.
- 1515 **Sereno PC.** 1991. *Lesothosaurus*, “fabrosaurids,” and the early evolution of Ornithischia. *Journal of*  
1516 *Vertebrate Paleontology* **11**:168–197. DOI: <http://dx.doi.org/10.1080/02724634.1991.10011386>
- 1517 **Sereno PC.** 1999. The evolution of dinosaurs. *Science* **284**:2137–2146. DOI:  
1518 [10.1126/science.284.5423.2137](https://doi.org/10.1126/science.284.5423.2137)
- 1519 **Sereno PC,** Dong ZM.1992. The skull of the basal stegosaur *Huayangosaurus taibaii* and a cladistic  
1520 diagnosis of Stegosauria. *Journal of Vertebrate Paleontology* **12**:318–343. DOI:  
1521 <https://doi.org/10.1080/02724634.1992.10011463>
- 1522 **Simmons DJ.** 1965. The non-therapsid reptiles of the Lufeng Basin, Yunnan, China. *Geology* **15**:1–93.
- 1523 **Thulborn RA.** 1972. The postcranial skeleton of the Triassic ornithischian dinosaur. *Fabrosaurus australis*.  
1524 *Palaeontology* **15**:29–60.
- 1525 **Upchurch P,** Barrett PM, Zhao XJ, Xu X. 2007. A re-evaluation of *Chinshakiangosaurus chunghoensis* Ye  
1526 vide Dong 1992 (Dinosauria, Sauropodomorpha): implications for cranial evolution in basal sauropod  
1527 dinosaurs. *Geological Magazine* **144**:247–262. DOI: <https://doi.org/10.1017/S0016756806003062>
- 1528 **Vickaryous MK.** 2006. New information on the cranial anatomy of *Edmontonia rugosidens* Gilmore, a Late  
1529 Cretaceous nodosaurid dinosaur from Dinosaur Provincial Park, Alberta. *Journal of Vertebrate*  
1530 *Paleontology* **26**:1011–1013. DOI: [https://doi.org/10.1671/0272-](https://doi.org/10.1671/0272-4634(2006)26[1011:NIOTCA]2.0.CO;2)  
1531 [4634\(2006\)26\[1011:NIOTCA\]2.0.CO;2](https://doi.org/10.1671/0272-4634(2006)26[1011:NIOTCA]2.0.CO;2)
- 1532 **Vickaryous MK,** Russell AP. 2003. A redescription of the skull of *Euoplocephalus tutus* (Archosauria:  
1533 Ornithischia): a foundation for comparative and systematic studies of ankylosaurian dinosaurs.  
1534 *Zoological Journal of the Linnean Society* **137**:157–186. DOI: [https://doi.org/10.1046/j.1096-](https://doi.org/10.1046/j.1096-3642.2003.00045.x)  
1535 [3642.2003.00045.x](https://doi.org/10.1046/j.1096-3642.2003.00045.x)

- 1536 **Vickaryous MK**, Maryanska T, Weishampel DB. 2004. Ankylosauria In: Weishampel DB, Dodson P,  
1537 Osmólska H, editors, *The Dinosauria (Second Edition)*. Berkeley: University of California Press, pp.  
1538 363–392. DOI: <http://dx.doi.org/10.1525/california/9780520242098.003.0020>
- 1539 **Vickaryous MK**, Russell AP, Currie PJ, Zhao XJ. 2001. A new ankylosaurid (Dinosauria: Ankylosauria)  
1540 from the Lower Cretaceous of China, with comments on ankylosaurian relationships. *Canadian Journal*  
1541 *of Earth Sciences* **38**:1767–1780. DOI: <https://doi.org/10.1139/e01-051>
- 1542 **Viglietti PA**, McPhee BW, Bordy EM, Sciscio L, Barrett PM, Benson RBJ, Wills S, Chapelle KEJ, Dollman  
1543 KN, Mdekazi C, Choiniere JN. 2020. Biostratigraphy of the *Massospondylus* Assemblage Zone  
1544 (Stormberg Group, Karoo Supergroup), South Africa. *South African Journal of Geology* **123**(2):249–  
1545 262. DOI: <https://doi.10.25131/sajg.123.0018>
- 1546 **Walker JD**, Geissman JW, Bowring SA, Babcock LE. 2018. Geologic Time Scale v. 5.0: Geological Society  
1547 of America. DOI: <https://doi.org/10.1130/2018.CTS005R3C>
- 1548 **Wang GF**, You HL, Pan SG, Wang T. 2017. A new crested theropod from the Early Jurassic of Yunnan  
1549 Province, China. *Vertebrata Palasiatica* **55**:177–186.
- 1550 **Zhen S**, Li J, Rao C. 1986. [Dinosaur footprints of Jinning, China] *Memoirs of the Beijing Natural History*  
1551 *Museum* **33**:1–19. [In Chinese]
